# Supplementary material
Source: PubMed Central journal article supplement (PMC5977996)
Supplement: NIHMS324814-supplement-2.pdf [file NIHMS324814-supplement-2.pdf]

## **Supplemental Data**

**Progression of human bronchioloalveolar carcinoma to invasive adenocarcinoma is modeled in a transgenic mouse model of K-ras-induced lung cancer by loss of the TGF- $\beta$  type II receptor**

**Alain C. Borczuk, Marieta Sole, Ping Lu, Jinli Chen, May-Lin Wilgus, Richard A. Friedman, Steven M. Albelda, Charles A. Powell.**

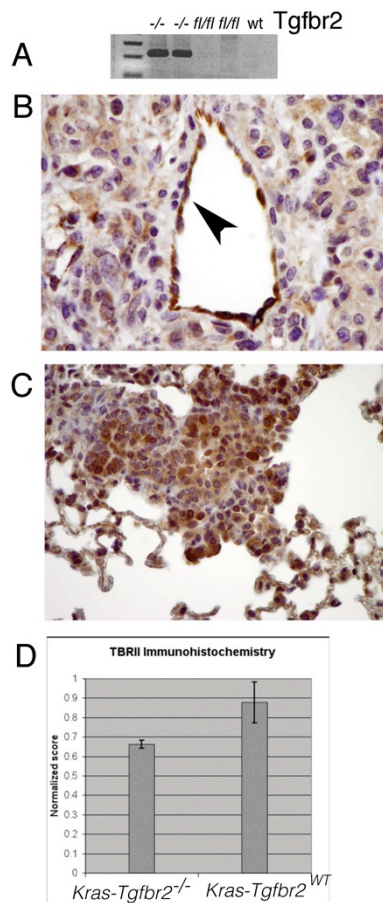

### Supplemental Figure 1. *Tgfr2* Recombination and TBR11 Expression in Mouse Lung

Mouse lungs were harvested for examination of *Tgfr2* recombination by DNA PCR (A). After intranasal administration of Adenoviral vector encoding Cre-recombinase, recombination was detected in *Kras-Tgfr2*<sup>-/-</sup> animals (lanes 1,2), but not in untreated mice (lanes 3,4) or in *Kras-Tgfr2*<sup>WT</sup> mice (lane 5). TBR11 immunostaining in *Kras-Tgfr2*<sup>-/-</sup> tumors is reduced (B) in intensity when compared internally to endothelial staining (arrow), and to *Kras-Tgfr2*<sup>WT</sup> tumor (C). The intensity of staining in tumor cells was 25% lower in *Kras-Tgfr2*<sup>-/-</sup> mice (c),  $P < .001$  (D). DAB immunohistochemistry, Original magnification x 150. We confirmed microarray data using quantitative real-time PCR for *Tgfr2* mRNA expression. *Tgfr2* expression was significantly reduced in *Kras-Tgfr2*<sup>-/-</sup> vs. mouse lung tissue vs. *Kras-Tgfr2*<sup>WT</sup> mouse tissue,  $p < 0.05$ .

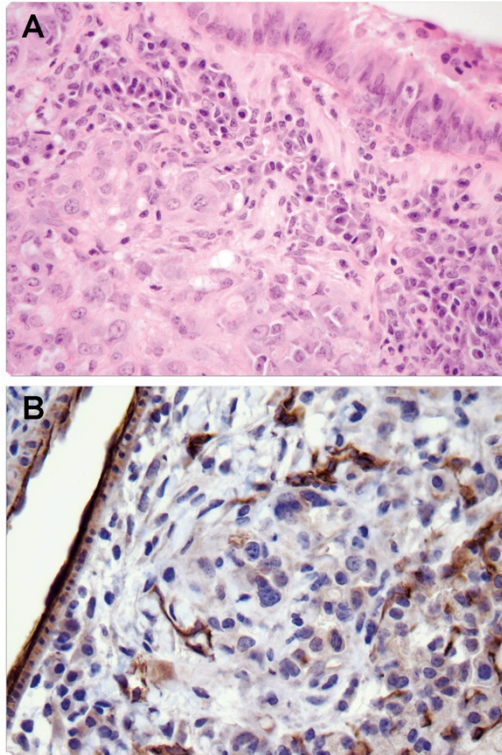

**Supplemental Figure 2. Tumor Microenvironment Inflammation and Neoangiogenesis in *Kras-Tgfr2<sup>-/-</sup>* mouse lung tumors.**

An exuberant inflammatory reaction of mononuclear cells and plasma cells was seen around tumor nests (A). Immunohistochemistry for CD31 reveals neo-vascularization as part of the stromal response (B).

A, Hematoxylin and eosin and B. DAB immunohistochemistry, Original magnification x 150.

**Supplemental Table 1. *KrasTgfb2*<sup>-/-</sup> Mouse Tumor Signature Genes Upregulated and Downregulated vs. *KrasTgfb2*<sup>WT</sup> Tumors.**

Genes UP in *KrasTgfb2*<sup>-/-</sup> Tumors, sorted by Fold-Change (all p < .001, FDR < 1%)

| Probe set    | Gene symbol   | Description                                                                                   | Fold-change |
|--------------|---------------|-----------------------------------------------------------------------------------------------|-------------|
| 1449088_at   | Fbp2          | fructose biphosphatase 2                                                                      | 31.9174489  |
| 1440409_at   | Gcnt3         | glucosaminyl (N-acetyl) transferase 3, mucin type                                             | 27.3597398  |
| 1421227_at   | Gzme          | granzyme E                                                                                    | 25.1154476  |
| 1449824_at   | Prg4          | proteoglycan 4 (megakaryocyte stimulating factor, articular superficial zone protein)         | 24.5662884  |
| 1419549_at   | Arg1          | arginase, liver                                                                               | 14.9723244  |
| 1418937_at   | Dio2          | deiodinase, iodothyronine, type II                                                            | 13.8806717  |
| 1438239_at   | Mid1          | midline 1                                                                                     | 13.3618425  |
| 1450171_x_at | Gzme          | granzyme E                                                                                    | 11.423847   |
| 1422571_at   | Thbs2         | thrombospondin 2                                                                              | 11.1651248  |
| 1449133_at   | Sprr1a        | small proline-rich protein 1A                                                                 | 10.9679516  |
| 1420992_at   | Ankrd1        | ankyrin repeat domain 1 (cardiac muscle)                                                      | 10.8222895  |
| 1434092_at   | Atg9b         | ATG9 autophagy related 9 homolog B ( <i>S. cerevisiae</i> )                                   | 10.1784824  |
| 1439016_x_at | Sprr2a        | small proline-rich protein 2A                                                                 | 10.0384519  |
| 1455627_at   | Col8a1        | collagen, type VIII, alpha 1                                                                  | 9.9627195   |
| 1423062_at   | Igfbp3        | insulin-like growth factor binding protein 3                                                  | 9.8940399   |
| 1448194_a_at | H19           | H19 fetal liver mRNA                                                                          | 9.7649179   |
| 1438148_at   | Cxcl3         | chemokine (C-X-C motif) ligand 3                                                              | 9.7006612   |
| 1419082_at   | Serpinb2      | serine (or cysteine) peptidase inhibitor, clade B, member 2                                   | 9.6569945   |
| 1450618_a_at | Sprr2a        | small proline-rich protein 2A                                                                 | 9.3850808   |
| 1448470_at   | Fbp1          | fructose biphosphatase 1                                                                      | 9.1573505   |
| 1449939_s_at | Dlk1          | delta-like 1 homolog ( <i>Drosophila</i> )                                                    | 9.009895    |
| 1444740_at   | 4930550L11Rik | RIKEN cDNA 4930550L11 gene                                                                    | 8.5839934   |
| 1416676_at   | Kng1          | kininogen 1                                                                                   | 8.4688516   |
| 1420512_at   | Dkk2          | dickkopf homolog 2 ( <i>Xenopus laevis</i> )                                                  | 8.4075839   |
| 1419728_at   | Cxcl5         | chemokine (C-X-C motif) ligand 5                                                              | 7.8364179   |
| 1418440_at   | Col8a1        | collagen, type VIII, alpha 1                                                                  | 7.5879764   |
| 1455965_at   | Adamts4       | a disintegrin-like and metallopeptidase (reprolysin type) with thrombospondin type 1 motif, 4 | 7.4833474   |
| 1434458_at   | Fst           | follistatin                                                                                   | 7.0672372   |
| 1437273_at   | Htra4         | HtrA serine peptidase 4                                                                       | 6.9161742   |
| 1421365_at   | Fst           | follistatin                                                                                   | 6.7574426   |
| 1422324_a_at | Pthlh         | parathyroid hormone-like peptide                                                              | 6.6869549   |
| 1434877_at   | Nptx1         | neuronal pentraxin 1                                                                          | 6.4834456   |
| 1447862_x_at | Thbs2         | thrombospondin 2                                                                              | 6.4386222   |
| 1419418_a_at | Morc1         | microorchidia 1                                                                               | 6.3532702   |
| 1422789_at   | Aldh1a2       | aldehyde dehydrogenase family 1, subfamily A2                                                 | 6.3166832   |
| 1424966_at   | Tmem40        | transmembrane protein 40                                                                      | 6.1604117   |
| 1460227_at   | Timp1         | tissue inhibitor of metalloproteinase 1                                                       | 6.1581517   |

|              |               |                                                                                          |           |
|--------------|---------------|------------------------------------------------------------------------------------------|-----------|
| 1418872_at   | Abcb1b        | ATP-binding cassette, sub-family B (MDR/TAP), member 1B                                  | 6.1462338 |
| 1416103_at   | Ywhaz         | tyrosine 3-monooxygenase/tryptophan 5-monooxygenase activation protein, zeta polypeptide | 6.1450466 |
| 1429841_at   | Megf10        | multiple EGF-like-domains 10                                                             | 6.0376384 |
| 1456084_x_at | Fmod          | fibromodulin                                                                             | 5.9928384 |
| 1428055_at   | Rian          | RNA imprinted and accumulated in nucleus                                                 | 5.9236717 |
| 1455736_at   | Mybpc2        | myosin binding protein C, fast-type                                                      | 5.9119106 |
| 1428223_at   | Mfsd2         | major facilitator superfamily domain containing 2                                        | 5.8427332 |
| 1420664_s_at | Procr         | protein C receptor, endothelial                                                          | 5.8372559 |
| 1451416_a_at | Tgm1          | transglutaminase 1, K polypeptide                                                        | 5.7436458 |
| 1449166_at   | S100a14       | S100 calcium binding protein A14                                                         | 5.7307791 |
| 1417466_at   | Rgs5          | regulator of G-protein signaling 5                                                       | 5.6827024 |
| 1424599_at   | Fgl1          | fibrinogen-like protein 1                                                                | 5.3830573 |
| 1441917_s_at | Tmem40        | transmembrane protein 40                                                                 | 5.2466487 |
| 1439311_at   | B830012L14Rik | RIKEN cDNA B830012L14 gene                                                               | 5.222183  |
| 1450663_at   | Thbs2         | thrombospondin 2                                                                         | 5.2134928 |
| 1427020_at   | Scara3        | scavenger receptor class A, member 3                                                     | 5.0479331 |
| 1428942_at   | Mt2           | metallothionein 2                                                                        | 4.9841902 |
| 1453480_at   | Tmem213       | transmembrane protein 213                                                                | 4.9526994 |
| 1418283_at   | Cldn4         | claudin 4                                                                                | 4.8960081 |
| 1418207_at   | Fxyd4         | FXDY domain-containing ion transport regulator 4                                         | 4.8773428 |
| 1420352_at   | Prss22        | protease, serine, 22                                                                     | 4.8543256 |
| 1431094_at   | 1110006E14Rik | RIKEN cDNA 1110006E14 gene                                                               | 4.8504944 |
| 1460285_at   | Itga9         | integrin alpha 9                                                                         | 4.8105446 |
| 1421207_at   | Lif           | leukemia inhibitory factor                                                               | 4.7770897 |
| 1459253_at   | Arrdc3        | arrestin domain containing 3                                                             | 4.7368358 |
| 1442590_at   | Tnfrsf22      | tumor necrosis factor receptor superfamily, member 22                                    | 4.6973812 |
| 1419820_at   | Pkhd1         | polycystic kidney and hepatic disease 1                                                  | 4.6169568 |
| 1449254_at   | Spp1          | secreted phosphoprotein 1                                                                | 4.6029751 |
| 1422053_at   | Inhba         | inhibin beta-A                                                                           | 4.5682854 |
| 1419775_at   |               |                                                                                          | 4.410038  |
| 1437718_x_at | Fmod          | fibromodulin                                                                             | 4.3741547 |
| 1437685_x_at | Fmod          | fibromodulin                                                                             | 4.3639419 |
| 1416645_a_at | Afp           | alpha fetoprotein                                                                        | 4.3573368 |
| 1450297_at   | Il6           | interleukin 6                                                                            | 4.338603  |
| 1449426_a_at | Anxa10        | annexin A10                                                                              | 4.3121065 |
| 1422643_at   | Moxd1         | monooxygenase, DBH-like 1                                                                | 4.3012068 |
| 1437324_x_at | Fmod          | fibromodulin                                                                             | 4.2905134 |
| 1448755_at   | Col15a1       | collagen, type XV, alpha 1                                                               | 4.2732373 |
| 1456789_at   | Zfp462        | zinc finger protein 462                                                                  | 4.2495062 |
| 1416658_at   | Frzb          | frizzled-related protein                                                                 | 4.2318307 |
| 1417013_at   | Hspb8         | heat shock protein 8                                                                     | 4.2239873 |
| 1433583_at   | Zfp365        | zinc finger protein 365                                                                  | 4.1108489 |
| 1418871_a_at | 1810007E14Rik | RIKEN cDNA 1810007E14 gene                                                               | 4.0920176 |

|              |               |                                                                 |           |
|--------------|---------------|-----------------------------------------------------------------|-----------|
| 1456527_at   | Hecw1         | HECT, C2 and WW domain containing E3 ubiquitin protein ligase 1 | 4.0863121 |
| 1425575_at   | Epha3         | Eph receptor A 3                                                | 4.0808995 |
| 1440001_at   | Rian          | RNA imprinted and accumulated in nucleus                        | 4.0562552 |
| 1427126_at   | Hspa1b        | heat shock protein 1B                                           | 4.0528965 |
| 1460238_at   | Msln          | mesothelin                                                      | 4.0383056 |
| 1427357_at   | Cda           | cytidine deaminase                                              | 4.0311373 |
| 1418304_at   | Pcdh21        | protocadherin 21                                                | 3.9982561 |
| 1423367_at   | Wnt7a         | wingless-related MMTV integration site 7A                       | 3.9833712 |
| 1458453_at   | Lmo7          | LIM domain only 7                                               | 3.9719877 |
| 1426268_at   | C130090K23Rik | RIKEN cDNA C130090K23 gene                                      | 3.9500467 |
| 1453839_a_at | Pi16          | peptidase inhibitor 16                                          | 3.8930926 |
| 1424885_at   | Klhdc8a       | kelch domain containing 8A                                      | 3.8857463 |
| 1448595_a_at | Bex1          | brain expressed gene 1                                          | 3.8471997 |
| 1427919_at   | Srpx2         | sushi-repeat-containing protein, X-linked 2                     | 3.7563582 |
| 1423407_a_at | Fbln2         | fibulin 2                                                       | 3.752306  |
| 1417024_at   | Hars          | histidyl-tRNA synthetase                                        | 3.7364566 |
| 1416342_at   | Tnc           | tenascin C                                                      | 3.7364369 |
| 1421172_at   | Adam12        | a disintegrin and metallopeptidase domain 12 (meltrin alpha)    | 3.6869575 |
| 1422179_at   | Gjb4          | gap junction protein, beta 4                                    | 3.6770818 |
| 1435264_at   | Emilin2       | elastin microfibril interfacier 2                               | 3.6715322 |
| 1447819_x_at | Col8a1        | collagen, type VIII, alpha 1                                    | 3.6583076 |
| 1423049_a_at | Tpm1          | tropomyosin 1, alpha                                            | 3.6578841 |
| 1437197_at   | Sorbs2        | sorbin and SH3 domain containing 2                              | 3.6467059 |
| 1438160_x_at | Slco4a1       | solute carrier organic anion transporter family, member 4a1     | 3.5949683 |
| 1451258_at   | Psca          | prostate stem cell antigen                                      | 3.5762316 |
| 1427127_x_at | Hspa1b        | heat shock protein 1B                                           | 3.5558739 |
| 1428636_at   | Steap2        | six transmembrane epithelial antigen of prostate 2              | 3.5535876 |
| 1429257_at   | Meg3          | maternally expressed 3                                          | 3.5437102 |
| 1422924_at   | Tnfsf9        | tumor necrosis factor (ligand) superfamily, member 9            | 3.5328774 |
| 1448894_at   | Akr1b8        | aldo-keto reductase family 1, member B8                         | 3.5153091 |
| 1425668_a_at | St3gal4       | ST3 beta-galactoside alpha-2,3-sialyltransferase 4              | 3.5128211 |
| 1424090_at   | Sdcbp2        | syndecan binding protein (syntenin) 2                           | 3.4997309 |
| 1428774_at   | Gpc6          | glypican 6                                                      | 3.487545  |
| 1435323_a_at | Mboat1        | membrane bound O-acyltransferase domain containing 1            | 3.4724102 |
| 1452478_at   | Alpk2         | alpha-kinase 2                                                  | 3.470486  |
| 1449152_at   | Cdkn2b        | cyclin-dependent kinase inhibitor 2B (p15, inhibits CDK4)       | 3.4564032 |
| 1425028_a_at | Tpm2          | tropomyosin 2, beta                                             | 3.4472122 |
| 1450387_s_at | Ak3l1         | adenylate kinase 3-like 1                                       | 3.4419271 |
| 1417308_at   | Pkm2          | pyruvate kinase, muscle                                         | 3.44155   |
| 1419431_at   | Ereg          | epiregulin                                                      | 3.4338896 |
| 1449450_at   | Ptges         | prostaglandin E synthase                                        | 3.4197164 |
| 1440634_at   |               |                                                                 | 3.4103892 |
| 1447678_at   | Hsd17b14      | hydroxysteroid (17-beta) dehydrogenase 14                       | 3.4039607 |

|              |               |                                                                                                |           |
|--------------|---------------|------------------------------------------------------------------------------------------------|-----------|
| 1434240_at   | 4632434I11Rik | RIKEN cDNA 4632434I11 gene                                                                     | 3.3990915 |
| 1431806_at   | 4931408D14Rik | RIKEN cDNA 4931408D14 gene                                                                     | 3.3886969 |
| 1423952_a_at | Krt7          | keratin 7                                                                                      | 3.3691578 |
| 1439793_at   | Gja3          | gap junction protein, alpha 3                                                                  | 3.365665  |
| 1448501_at   | Tspan6        | tetraspanin 6                                                                                  | 3.3540149 |
| 1417343_at   | Fxyd6         | FXDY domain-containing ion transport regulator 6                                               | 3.3000008 |
| 1460042_at   | Slc23a3       | solute carrier family 23 (nucleobase transporters), member 3                                   | 3.272299  |
| 1428764_at   | Meg3          | maternally expressed 3                                                                         | 3.2652353 |
| 1421134_at   | Areg          | amphiregulin                                                                                   | 3.2472546 |
| 1439827_at   | Adamts12      | a disintegrin-like and metallopeptidase (reprolysin type) with thrombospondin type 1 motif, 12 | 3.2347896 |
| 1417764_at   | Ssr1          | signal sequence receptor, alpha                                                                | 3.2347596 |
| 1425182_x_at | Klk1b9        | kallikrein 1-related peptidase b9                                                              | 3.2269268 |
| 1423640_at   | Synpr         | synaptopodin                                                                                   | 3.217273  |
| 1418449_at   | Lad1          | ladinin                                                                                        | 3.2165174 |
| 1438966_x_at | Fmod          | fibromodulin                                                                                   | 3.215427  |
| 1427580_a_at | Rian          | RNA imprinted and accumulated in nucleus                                                       | 3.2144935 |
| 1424793_a_at | Pbp2          | phosphatidylethanolamine binding protein 2                                                     | 3.2121862 |
| 1438773_at   | Steap2        | six transmembrane epithelial antigen of prostate 2                                             | 3.1573318 |
| 1435190_at   | Chl1          | cell adhesion molecule with homology to L1CAM                                                  | 3.1538038 |
| 1452963_at   | 9530077C05Rik | RIKEN cDNA 9530077C05 gene                                                                     | 3.1427113 |
| 1445824_at   | Zfp458        | zinc finger protein 458                                                                        | 3.1413536 |
| 1421375_a_at | S100a6        | S100 calcium binding protein A6 (calcyclin)                                                    | 3.1412828 |
| 1451346_at   | Mtap          | methylthioadenosine phosphorylase                                                              | 3.1141466 |
| 1419738_a_at | Tpm2          | tropomyosin 2, beta                                                                            | 3.113761  |
| 1437092_at   | Clip4         | CAP-GLY domain containing linker protein family, member 4                                      | 3.1135637 |
| 1437417_s_at | LOC100045283  | similar to Glypican 6                                                                          | 3.095015  |
| 1418649_at   | Egln3         | EGL nine homolog 3 (C. elegans)                                                                | 3.0911983 |
| 1436520_at   | Ahnak2        | AHNAK nucleoprotein 2                                                                          | 3.0846504 |
| 1455426_at   | Epha3         | Eph receptor A3                                                                                | 3.0834374 |
| 1450922_a_at | Tgfb2         | transforming growth factor, beta 2                                                             | 3.0813016 |
| 1419725_at   | Slc26a4       | solute carrier family 26, member 4                                                             | 3.0794409 |
| 1421505_at   | Mixl1         | Mix1 homeobox-like 1 (Xenopus laevis)                                                          | 3.0757815 |
| 1416588_at   | Ptpn          | protein tyrosine phosphatase, receptor type, N                                                 | 3.0563055 |
| 1452388_at   | Hspa1a        | heat shock protein 1A                                                                          | 3.0509257 |
| 1422557_s_at | Mt1           | metallothionein 1                                                                              | 3.0145891 |
| 1427440_a_at | Afm           | afamin                                                                                         | 3.0054842 |
| 1417156_at   | Krt19         | keratin 19                                                                                     | 2.9864909 |
| 1452183_a_at | Meg3          | maternally expressed 3                                                                         | 2.9734654 |
| 1458015_at   | Megf11        | multiple EGF-like-domains 11                                                                   | 2.9678932 |
| 1420558_at   | Selp          | selectin, platelet                                                                             | 2.9628507 |
| 1438824_at   | Slc20a1       | solute carrier family 20, member 1                                                             | 2.9521411 |
| 1452906_at   | Meg3          | maternally expressed 3                                                                         | 2.9498669 |
| 1418626_a_at | Clu           | clusterin                                                                                      | 2.9371219 |

|              |               |                                                                          |           |
|--------------|---------------|--------------------------------------------------------------------------|-----------|
| 1450627_at   | Ank           | progressive ankylosis                                                    | 2.9370954 |
| 1419292_at   | Htra3         | HtrA serine peptidase 3                                                  | 2.936375  |
| 1438651_a_at | Aplnr         | apelin receptor                                                          | 2.9352952 |
| 1429021_at   | Epha4         | Eph receptor A4                                                          | 2.9317696 |
| 1416872_at   | Tspan6        | tetraspanin 6                                                            | 2.9224283 |
| 1420503_at   | Slc6a14       | solute carrier family 6 (neurotransmitter transporter), member 14        | 2.9118058 |
| 1416531_at   | Gsto1         | glutathione S-transferase omega 1                                        | 2.8934945 |
| 1434641_x_at | Sez6l2        | seizure related 6 homolog like 2                                         | 2.8744613 |
| 1452614_at   | Bcl2l15       | BCL2-like 15                                                             | 2.8610942 |
| 1434969_at   | Brunol5       | bruno-like 5, RNA binding protein (Drosophila)                           | 2.8567139 |
| 1419130_at   | Adat2         | adenosine deaminase, tRNA-specific 2, TAD2 homolog (S. cerevisiae)       | 2.8486202 |
| 1439747_at   | Ptges         | prostaglandin E synthase                                                 | 2.8480503 |
| 1419022_a_at | Eno1          | enolase 1, alpha non-neuron                                              | 2.8348228 |
| 1450201_at   | Proz          | protein Z, vitamin K-dependent plasma glycoprotein                       | 2.8313744 |
| 1449033_at   | Tnfrsf11b     | tumor necrosis factor receptor superfamily, member 11b (osteoprotegerin) | 2.825635  |
| 1456429_at   | Malt1         | mucosa associated lymphoid tissue lymphoma translocation gene 1          | 2.8176999 |
| 1429239_a_at | Stard4        | StAR-related lipid transfer (START) domain containing 4                  | 2.8165635 |
| 1459187_at   | 9330161A08Rik | RIKEN cDNA 9330161A08 gene                                               | 2.816558  |
| 1456126_at   | Malt1         | mucosa associated lymphoid tissue lymphoma translocation gene 1          | 2.7933624 |
| 1434411_at   | Col12a1       | collagen, type XII, alpha 1                                              | 2.7799827 |
| 1428765_at   | Meg3          | maternally expressed 3                                                   | 2.7769503 |
| 1451612_at   | Mt1           | metallothionein 1                                                        | 2.7674432 |
| 1423771_at   | Prkcdbp       | protein kinase C, delta binding protein                                  | 2.7574346 |
| 1436188_a_at | Ndr4          | N-myc downstream regulated gene 4                                        | 2.7566889 |
| 1452905_at   | Meg3          | maternally expressed 3                                                   | 2.7507812 |
| 1439148_a_at | Pfkl          | phosphofructokinase, liver, B-type                                       | 2.7364723 |
| 1424941_at   | BC016579      | cDNA sequence, BC016579                                                  | 2.7357701 |
| 1427013_at   | Car9          | carbonic anhydrase 9                                                     | 2.7351512 |
| 1426758_s_at | Meg3          | maternally expressed 3                                                   | 2.734319  |
| 1425675_s_at | Ceacam1       | carcinoembryonic antigen-related cell adhesion molecule 1                | 2.7312245 |
| 1452218_at   | Ccdc117       | coiled-coil domain containing 117                                        | 2.7268617 |
| 1436879_x_at | Afp           | alpha fetoprotein                                                        | 2.7208074 |
| 1449449_at   | Ptges         | prostaglandin E synthase                                                 | 2.7107987 |
| 1423948_at   | Bag2          | BCL2-associated athanogene 2                                             | 2.6946356 |
| 1415800_at   | Gja1          | gap junction protein, alpha 1                                            | 2.6845354 |
| 1417109_at   | Tinagl1       | tubulointerstitial nephritis antigen-like 1                              | 2.6829255 |
| 1416200_at   | Il33          | interleukin 33                                                           | 2.670938  |
| 1419023_x_at | Eno1          | enolase 1, alpha non-neuron                                              | 2.6622305 |
| 1420804_s_at | Clec4d        | C-type lectin domain family 4, member d                                  | 2.6532791 |
| 1452318_a_at | Hspa1b        | heat shock protein 1B                                                    | 2.6514003 |



|              |               |                                                                                        |           |
|--------------|---------------|----------------------------------------------------------------------------------------|-----------|
| 1422914_at   | Sp5           | trans-acting transcription factor 5                                                    | 2.6383491 |
| 1418393_a_at | Itga7         | integrin alpha 7                                                                       | 2.6372012 |
| 1448169_at   | Krt18         | keratin 18                                                                             | 2.6349481 |
| 1415918_a_at | Tpi1          | triosephosphate isomerase 1                                                            | 2.6317889 |
| 1456344_at   | Tnc           | tenascin C                                                                             | 2.6247126 |
| 1435571_at   | Mpzl3         | myelin protein zero-like 3                                                             | 2.6234122 |
| 1436216_s_at | 2610204M08Rik | RIKEN cDNA 2610204M08 gene                                                             | 2.62248   |
| 1422837_at   | Scel          | sciellin                                                                               | 2.6215308 |
| 1460465_at   | A930038C07Rik | RIKEN cDNA A930038C07 gene                                                             | 2.6214086 |
| 1428400_at   | 2200002K05Rik | RIKEN cDNA 2200002K05 gene                                                             | 2.6179375 |
| 1433523_at   | Radil         | Ras association and DIL domains                                                        | 2.6169677 |
| 1436359_at   | Ret           | ret proto-oncogene                                                                     | 2.6026488 |
| 1448265_x_at | Mpzl2         | myelin protein zero-like 2                                                             | 2.6020061 |
| 1419688_at   | Gpc6          | glypican 6                                                                             | 2.5987835 |
| 1426599_a_at | Slc2a1        | solute carrier family 2 (facilitated glucose transporter), member 1                    | 2.5981261 |
| 1419086_at   | Fgfbp1        | fibroblast growth factor binding protein 1                                             | 2.5712924 |
| 1452014_a_at | Igf1          | insulin-like growth factor 1                                                           | 2.5687379 |
| 1448568_a_at | Slc20a1       | solute carrier family 20, member 1                                                     | 2.5667844 |
| 1457030_at   | Mirg          | miRNA containing gene                                                                  | 2.5639236 |
| 1419207_at   | Zfp37         | zinc finger protein 37                                                                 | 2.5568267 |
| 1417234_at   | Mmp11         | matrix metalloproteinase 11                                                            | 2.5541123 |
| 1449577_x_at | Tpm2          | tropomyosin 2, beta                                                                    | 2.5503659 |
| 1427404_x_at | EG433182      | predicted gene, EG433182                                                               | 2.5464267 |
| 1459713_s_at | Ano1          | anoctamin 1, calcium activated chloride channel                                        | 2.5435337 |
| 1434195_at   | Prss35        | protease, serine, 35                                                                   | 2.5279    |
| 1431795_a_at | Sema3b        | sema domain, immunoglobulin domain (Ig), short basic domain, secreted, (semaphorin) 3B | 2.5244261 |
| 1441438_at   | Gpc6          | glypican 6                                                                             | 2.5220221 |
| 1448395_at   | Sfrp1         | secreted frizzled-related protein 1                                                    | 2.5206969 |
| 1448594_at   | Wisp1         | WNT1 inducible signaling pathway protein 1                                             | 2.5152154 |
| 1435659_a_at | Tpi1          | triosephosphate isomerase 1                                                            | 2.5051748 |
| 1440097_at   | Mirg          | miRNA containing gene                                                                  | 2.5017794 |
| 1441315_s_at | Slc19a2       | solute carrier family 19 (thiamine transporter), member 2                              | 2.4981513 |
| 1417389_at   | Gpc1          | glypican 1                                                                             | 2.4970308 |
| 1422860_at   | Nts           | neurotensin                                                                            | 2.4916793 |
| 1443732_at   |               |                                                                                        | 2.4864067 |
| 1419613_at   | Col7a1        | collagen, type VII, alpha 1                                                            | 2.4805353 |
| 1424507_at   | Rin1          | Ras and Rab interactor 1                                                               | 2.4342041 |

Genes DOWN in *KrasTgfr2*<sup>-/-</sup> Tumors, sorted by Fold-Change (all p <.001, FDR < 1%)

| Probe set    | Gene symbol   | Description                                                                                                                     | Fold-change |
|--------------|---------------|---------------------------------------------------------------------------------------------------------------------------------|-------------|
| 1455869_at   |               |                                                                                                                                 | 0.0034693   |
| 1431213_a_at | LOC67527      | murine leukemia retrovirus                                                                                                      | 0.0040569   |
| 1419905_s_at | Hpgd          | hydroxyprostaglandin dehydrogenase 15 (NAD)                                                                                     | 0.0422233   |
| 1446471_at   |               |                                                                                                                                 | 0.060439    |
| 1418429_at   | Kif5b         | kinesin family member 5B                                                                                                        | 0.0703627   |
| 1435514_at   | Lztf1         | leucine zipper transcription factor-like 1                                                                                      | 0.0749609   |
| 1449533_at   | Tmem100       | transmembrane protein 100                                                                                                       | 0.0893155   |
| 1430642_at   | 2900001G08Rik | RIKEN cDNA 2900001G08 gene                                                                                                      | 0.098297    |
| 1456655_at   |               |                                                                                                                                 | 0.1011693   |
| 1435459_at   | Fmo2          | flavin containing monooxygenase 2                                                                                               | 0.1015867   |
| 1422905_s_at | Fmo2          | flavin containing monooxygenase 2                                                                                               | 0.1040787   |
| 1430567_at   | Spink5        | serine peptidase inhibitor, Kazal type 5                                                                                        | 0.1121542   |
| 1451527_at   | Pcolce2       | procollagen C-endopeptidase enhancer 2                                                                                          | 0.1150064   |
| 1418697_at   | Inmt          | indolethylamine N-methyltransferase                                                                                             | 0.1181934   |
| 1439475_at   | Zfp429        | zinc finger protein 429                                                                                                         | 0.1211038   |
| 1436043_at   | Scn7a         | sodium channel, voltage-gated, type VII, alpha                                                                                  | 0.1233114   |
| 1453152_at   | Mamdc2        | MAM domain containing 2                                                                                                         | 0.1236891   |
| 1436044_at   | Scn7a         | sodium channel, voltage-gated, type VII, alpha                                                                                  | 0.1242306   |
| 1435767_at   | Scn3b         | sodium channel, voltage-gated, type III, beta                                                                                   | 0.1253479   |
| 1445929_at   | 100042424     | predicted gene, 100042424                                                                                                       | 0.1298832   |
| 1437128_a_at | A630033E08Rik | RIKEN cDNA A630033E08 gene                                                                                                      | 0.1314668   |
| 1422640_at   | Pcdhb9        | protocadherin beta 9                                                                                                            | 0.1397838   |
| 1434152_at   | Apol7c        | apolipoprotein L 7c                                                                                                             | 0.1414799   |
| 1435943_at   | Dpep1         | dipeptidase 1 (renal)                                                                                                           | 0.14158     |
| 1416456_a_at | Chia          | chitinase, acidic                                                                                                               | 0.1439568   |
| 1435642_at   | Prr18         | proline rich region 18                                                                                                          | 0.1444529   |
| 1417429_at   | Fmo1          | flavin containing monooxygenase 1                                                                                               | 0.1467483   |
| 1421057_at   | Dnase1l3      | deoxyribonuclease 1-like 3                                                                                                      | 0.1488798   |
| 1429831_at   | Pik3ap1       | phosphoinositide-3-kinase adaptor protein 1                                                                                     | 0.1492475   |
| 1449347_a_at | Xlr4b         | X-linked lymphocyte-regulated 4B                                                                                                | 0.151145    |
| 1454402_at   | 3110048L19Rik | RIKEN cDNA 3110048L19 gene                                                                                                      | 0.1549229   |
| 1460039_at   | Clec1a        | C-type lectin domain family 1, member a                                                                                         | 0.1557879   |
| 1452666_a_at | Tmcc2         | transmembrane and coiled-coil domains 2                                                                                         | 0.1559726   |
| 1423226_at   | Ms4a1         | membrane-spanning 4-domains, subfamily A, member 1                                                                              | 0.1597834   |
| 1454966_at   | Itga8         | integrin alpha 8                                                                                                                | 0.1598427   |
| 1437932_a_at | Cldn1         | claudin 1                                                                                                                       | 0.1598543   |
| 1422188_s_at | Tcrg-V3       | T-cell receptor gamma, variable 3                                                                                               | 0.1604643   |
| 1433716_x_at | Gfra2         | glial cell line derived neurotrophic factor family receptor alpha 2                                                             | 0.1608052   |
| 1421979_at   | Phex          | phosphate regulating gene with homologies to endopeptidases on the X chromosome (hypophosphatemia, vitamin D resistant rickets) | 0.163856    |
| 1439595_at   | Tcra          | T-cell receptor alpha chain                                                                                                     | 0.1658076   |

|              |               |                                                                                                |           |
|--------------|---------------|------------------------------------------------------------------------------------------------|-----------|
| 1444946_at   |               |                                                                                                | 0.169717  |
| 1439376_x_at | Dmtf1         | cyclin D binding myb-like transcription factor 1                                               | 0.1706176 |
| 1421195_at   | Cckar         | cholecystokinin A receptor                                                                     | 0.1714718 |
| 1435710_at   | AI661384      | expressed sequence AI661384                                                                    | 0.1726992 |
| 1449525_at   | Fmo3          | flavin containing monooxygenase 3                                                              | 0.1733044 |
| 1418652_at   | Cxcl9         | chemokine (C-X-C motif) ligand 9                                                               | 0.1752965 |
| 1446625_at   | Tmem100       | transmembrane protein 100                                                                      | 0.1762681 |
| 1421317_x_at | Myb           | myeloblastosis oncogene                                                                        | 0.1764352 |
| 1423467_at   | Ms4a4b        | membrane-spanning 4-domains, subfamily A, member 4B                                            | 0.1770161 |
| 1453698_at   | 6030451C04Rik | RIKEN cDNA 6030451C04 gene                                                                     | 0.1785047 |
| 1460670_at   | Riok3         | RIO kinase 3 (yeast)                                                                           | 0.178837  |
| 1443270_at   |               |                                                                                                | 0.1800947 |
| 1450912_at   | Ms4a1         | membrane-spanning 4-domains, subfamily A, member 1                                             | 0.1804682 |
| 1434171_at   | C330011K17Rik | RIKEN cDNA C330011K17 gene                                                                     | 0.182648  |
| 1460407_at   | Spib          | Spi-B transcription factor (Spi-1/PU.1 related)                                                | 0.1830406 |
| 1449925_at   | Cxcr3         | chemokine (C-X-C motif) receptor 3                                                             | 0.185063  |
| 1444487_at   | Lrat          | lecithin-retinol acyltransferase (phosphatidylcholine-retinol-O-acyltransferase)               | 0.1851926 |
| 1425814_a_at | Calcr1        | calcitonin receptor-like                                                                       | 0.1861827 |
| 1449158_at   | Kcnk2         | potassium channel, subfamily K, member 2                                                       | 0.1863895 |
| 1450194_a_at | Myb           | myeloblastosis oncogene                                                                        | 0.186904  |
| 1446748_at   | 2010007H06Rik | RIKEN cDNA 2010007H06 gene                                                                     | 0.1870023 |
| 1437933_at   | Hhip          | Hedgehog-interacting protein                                                                   | 0.1870288 |
| 1455277_at   | Hhip          | Hedgehog-interacting protein                                                                   | 0.1874    |
| 1441218_at   | Ttc21a        | Tetratricopeptide repeat domain 21A                                                            | 0.1877835 |
| 1438466_at   | Dnahc7b       | dynein, axonemal, heavy chain 7B                                                               | 0.1891812 |
| 1419468_at   | Clec14a       | C-type lectin domain family 14, member a                                                       | 0.1902567 |
| 1455656_at   | Btla          | B and T lymphocyte associated                                                                  | 0.1904622 |
| 1453841_at   | 2310050P20Rik | RIKEN cDNA 2310050P20 gene                                                                     | 0.1909626 |
| 1447551_x_at | Lphn3         | latrophilin 3                                                                                  | 0.1914319 |
| 1430190_at   | 1700041C02Rik | RIKEN cDNA 1700041C02 gene                                                                     | 0.1953136 |
| 1436649_at   | Ikzf3         | IKAROS family zinc finger 3                                                                    | 0.1971555 |
| 1456901_at   | Adamts20      | a disintegrin-like and metallopeptidase (reprolysin type) with thrombospondin type 1 motif, 20 | 0.1993594 |
| 1422812_at   | Cxcr6         | chemokine (C-X-C motif) receptor 6                                                             | 0.2009945 |
| 1419467_at   | Clec14a       | C-type lectin domain family 14, member a                                                       | 0.2021412 |
| 1426712_at   | Slc6a15       | solute carrier family 6 (neurotransmitter transporter), member 15                              | 0.203103  |
| 1434280_at   |               |                                                                                                | 0.2033148 |
| 1436296_x_at | Dnaic2        | dynein, axonemal, intermediate chain 2                                                         | 0.2035729 |
| 1440837_at   | H2-Ob         | histocompatibility 2, O region beta locus                                                      | 0.2043204 |
| 1425947_at   | Ifng          | interferon gamma                                                                               | 0.2056106 |
| 1453435_a_at | Fmo2          | flavin containing monooxygenase 2                                                              | 0.2066628 |
| 1453752_at   | Rpl17         | ribosomal protein L17                                                                          | 0.2075471 |
| 1420437_at   | Ido1          | indoleamine 2,3-dioxygenase 1                                                                  | 0.2081165 |
| 1417839_at   | Cldn5         | claudin 5                                                                                      | 0.2081276 |

|              |               |                                                                       |           |
|--------------|---------------|-----------------------------------------------------------------------|-----------|
| 1425854_x_at | Tcrb-J        | T-cell receptor beta, joining region                                  | 0.2081527 |
| 1423292_a_at | Prx           | periaxin                                                              | 0.2123695 |
| 1417447_at   | Tcf21         | transcription factor 21                                               | 0.2128575 |
| 1449361_at   | Tbx21         | T-box 21                                                              | 0.2136313 |
| 1435227_at   | Bcl11b        | B-cell leukemia/lymphoma 11B                                          | 0.2137278 |
| 1459661_at   | AW492955      | expressed sequence AW492955                                           | 0.2141378 |
| 1416967_at   | Sox2          | SRY-box containing gene 2                                             | 0.2147519 |
| 1452205_x_at | Tcrb-J        | T-cell receptor beta, joining region                                  | 0.21714   |
| 1418723_at   | Lpar3         | lysophosphatidic acid receptor 3                                      | 0.217285  |
| 1439034_at   | Spn           | sialophorin                                                           | 0.2177506 |
| 1425396_a_at | Lck           | lymphocyte protein tyrosine kinase                                    | 0.2183305 |
| 1450753_at   | Nkg7          | natural killer cell group 7 sequence                                  | 0.2197857 |
| 1425470_at   |               |                                                                       | 0.2223831 |
| 1428808_at   | Prickle2      | prickle-like 2 (Drosophila)                                           | 0.2224194 |
| 1451355_at   | Acer2         | alkaline ceramidase 2                                                 | 0.2250807 |
| 1453782_at   | 3021401C12Rik | RIKEN cDNA 3021401C12 gene                                            | 0.2264511 |
| 1418509_at   | Cbr2          | carbonyl reductase 2                                                  | 0.2270593 |
| 1429209_at   | Col23a1       | collagen, type XXIII, alpha 1                                         | 0.2283534 |
| 1425294_at   | Slamf8        | SLAM family member 8                                                  | 0.2284696 |
| 1430047_at   | Brctd1        | BRCT domain containing 1                                              | 0.2285136 |
| 1453571_at   | Depdc6        | DEP domain containing 6                                               | 0.2293921 |
| 1442447_at   |               |                                                                       | 0.22956   |
| 1457163_at   | D730035F11Rik | RIKEN cDNA D730035F11 gene                                            | 0.2300395 |
| 1429210_at   | Col23a1       | collagen, type XXIII, alpha 1                                         | 0.2300537 |
| 1420544_at   | Gcet2         | germinal center expressed transcript 2                                | 0.2310464 |
| 1428347_at   | Cyfip2        | cytoplasmic FMR1 interacting protein 2                                | 0.2310704 |
| 1422725_at   | Mak           | male germ cell-associated kinase                                      | 0.2317289 |
| 1438089_a_at | Bclaf1        | BCL2-associated transcription factor 1                                | 0.2318858 |
| 1438392_at   |               |                                                                       | 0.2321138 |
| 1441845_at   | Caps2         | calcyphosphine 2                                                      | 0.232671  |
| 1455383_at   | Gm1381        | gene model 1381, (NCBI)                                               | 0.2333865 |
| 1436675_at   | Wdr63         | WD repeat domain 63                                                   | 0.2338249 |
| 1426772_x_at | Tcrb-J        | T-cell receptor beta, joining region                                  | 0.2357704 |
| 1425832_a_at | Cxcr6         | chemokine (C-X-C motif) receptor 6                                    | 0.2360076 |
| 1435939_s_at | Hepacam2      | HEPACAM family member 2                                               | 0.2368312 |
| 1428599_at   | Kndc1         | kinase non-catalytic C-lobe domain (KIND) containing 1                | 0.2386031 |
| 1417597_at   | Cd28          | CD28 antigen                                                          | 0.2392653 |
| 1429726_at   | Slc16a9       | solute carrier family 16 (monocarboxylic acid transporters), member 9 | 0.240293  |
| 1446850_at   |               |                                                                       | 0.2406479 |
| 1418770_at   | Cd2           | CD2 antigen                                                           | 0.2411771 |
| 1418511_at   | Dpt           | dermatopontin                                                         | 0.2412018 |
| 1429954_at   | Clec4a3       | C-type lectin domain family 4, member a3                              | 0.2421667 |
| 1422771_at   | Smad6         | MAD homolog 6 (Drosophila)                                            | 0.2428451 |
| 1425226_x_at | Tcrb-J        | T-cell receptor beta, joining region                                  | 0.2441147 |
| 1428735_at   | Cd69          | CD69 antigen                                                          | 0.2444961 |

|              |               |                                                                     |           |
|--------------|---------------|---------------------------------------------------------------------|-----------|
| 1432513_a_at | 1700001C02Rik | RIKEN cDNA 1700001C02 gene                                          | 0.244609  |
| 1434141_at   | Gucy1a3       | guanylate cyclase 1, soluble, alpha 3                               | 0.2465684 |
| 1424181_at   | Sept6         | septin 6                                                            | 0.246618  |
| 1446656_at   |               |                                                                     | 0.2468658 |
| 1418788_at   | Tek           | endothelial-specific receptor tyrosine kinase                       | 0.247148  |
| 1458500_at   | AU021034      | expressed sequence AU021034                                         | 0.2476488 |
| 1439795_at   | Gpr64         | G protein-coupled receptor 64                                       | 0.2477478 |
| 1435792_at   | Csprs         | component of Sp100-rs                                               | 0.2490504 |
| 1440911_at   | Col23a1       | collagen, type XXIII, alpha 1                                       | 0.2503838 |
| 1419192_at   | Il4i1         | interleukin 4 induced 1                                             | 0.2505003 |
| 1436600_at   | Tox3          | TOX high mobility group box family member 3                         | 0.2506856 |
| 1418353_at   | Cd5           | CD5 antigen                                                         | 0.2516648 |
| 1450339_a_at | Bcl11b        | B-cell leukemia/lymphoma 11B                                        | 0.2520211 |
| 1439956_at   | Ms4a6b        | Membrane-spanning 4-domains, subfamily A, member 6B                 | 0.2532025 |
| 1416194_at   | Cyp4b1        | cytochrome P450, family 4, subfamily b, polypeptide 1               | 0.2532843 |
| 1421040_a_at | Gsta2         | glutathione S-transferase, alpha 2 (Yc2)                            | 0.254388  |
| 1434962_x_at | Ccl27a        | chemokine (C-C motif) ligand 27A                                    | 0.2544164 |
| 1456064_at   | Kcna3         | potassium voltage-gated channel, shaker-related subfamily, member 3 | 0.2549909 |
| 1436501_at   | Mtus1         | mitochondrial tumor suppressor 1                                    | 0.256365  |
| 1460107_at   | Fam154b       | family with sequence similarity 154, member B                       | 0.2568012 |
| 1428960_at   | 4933434I06Rik | RIKEN cDNA 4933434I06 gene                                          | 0.2568111 |
| 1423298_at   | Add3          | adducin 3 (gamma)                                                   | 0.2586354 |
| 1436598_at   | Icos          | inducible T-cell co-stimulator                                      | 0.2601276 |
| 1448792_a_at | Cyp2f2        | cytochrome P450, family 2, subfamily f, polypeptide 2               | 0.2602653 |
| 1459601_at   | Sik1          | salt inducible kinase 1                                             | 0.2603179 |
| 1421358_at   | H2-M3         | histocompatibility 2, M region locus 3                              | 0.2605341 |
| 1457241_at   |               |                                                                     | 0.2606807 |
| 1455161_at   | AI504432      | expressed sequence AI504432                                         | 0.2612565 |
| 1455859_at   | A330021E22Rik | RIKEN cDNA A330021E22 gene                                          | 0.2626912 |
| 1445884_at   |               |                                                                     | 0.2627272 |
| 1433888_at   | Atp2b2        | ATPase, Ca <sup>++</sup> transporting, plasma membrane 2            | 0.2632329 |
| 1428108_x_at | Tmcc2         | transmembrane and coiled-coil domains 2                             | 0.2634367 |
| 1452514_a_at | Kit           | kit oncogene                                                        | 0.2638025 |
| 1416225_at   | Adh1          | alcohol dehydrogenase 1 (class I)                                   | 0.2639571 |
| 1422606_at   | C1qtnf3       | C1q and tumor necrosis factor related protein 3                     | 0.2639608 |
| 1456318_at   | Clec1a        | C-type lectin domain family 1, member a                             | 0.2644667 |
| 1446484_at   |               |                                                                     | 0.2655188 |
| 1438052_at   | A130071D04Rik | RIKEN cDNA A130071D04 gene                                          | 0.265719  |
| 1448949_at   | Car4          | carbonic anhydrase 4                                                | 0.2659727 |
| 1450357_a_at | Ccr6          | chemokine (C-C motif) receptor 6                                    | 0.2662716 |
| 1437479_x_at | Tbx3          | T-box 3                                                             | 0.2668603 |
| 1444270_at   | Rsph4a        | radial spoke head 4 homolog A (Chlamydomonas)                       | 0.2669952 |
| 1460555_at   | Fam65b        | family with sequence similarity 65, member B                        | 0.2679967 |

|              |               |                                                               |           |
|--------------|---------------|---------------------------------------------------------------|-----------|
| 1429177_x_at | Sox17         | SRY-box containing gene 17                                    | 0.2696664 |
| 1431577_at   | 5430437J10Rik | RIKEN cDNA 5430437J10 gene                                    | 0.2700653 |
| 1449216_at   | Itgae         | integrin alpha E, epithelial-associated                       | 0.2708613 |
| 1458589_at   |               |                                                               | 0.27225   |
| 1452284_at   | Ptprz1        | protein tyrosine phosphatase, receptor type Z, polypeptide 1  | 0.2729896 |
| 1437096_at   | Ttc29         | tetratricopeptide repeat domain 29                            | 0.273269  |
| 1441172_at   |               |                                                               | 0.2735332 |
| 1434372_at   | AW112010      | expressed sequence AW112010                                   | 0.2737569 |
| 1439833_at   | Sept3         | septin3                                                       | 0.2753125 |
| 1454897_at   | 6330509M05Rik | RIKEN cDNA 6330509M05 gene                                    | 0.2755753 |
| 1446591_at   | Gm1574        | gene model 1574, (NCBI)                                       | 0.2755888 |
| 1457694_at   | 6430537H07Rik | RIKEN cDNA 6430537H07 gene                                    | 0.2759113 |
| 1435582_at   | Wdfy4         | WD repeat and FYVE domain containing 4                        | 0.276085  |
| 1417995_at   | Ptpn22        | protein tyrosine phosphatase, non-receptor type 22 (lymphoid) | 0.2768855 |
| 1418057_at   | Tiam1         | T-cell lymphoma invasion and metastasis 1                     | 0.2773649 |
| 1425005_at   | Klrc1         | killer cell lectin-like receptor subfamily C, member 1        | 0.2787951 |
| 1456711_at   | 4932425I24Rik | RIKEN cDNA 4932425I24 gene                                    | 0.2801954 |
| 1421855_at   | Fgl2          | fibrinogen-like protein 2                                     | 0.2808363 |
| 1434083_a_at | Elmod1        | ELMO domain containing 1                                      | 0.2810835 |
| 1443337_at   |               |                                                               | 0.2819053 |
| 1442472_at   | Ttc21a        | Tetratricopeptide repeat domain 21A                           | 0.2819208 |
| 1422230_s_at | Cyp2a5        | cytochrome P450, family 2, subfamily a, polypeptide 5         | 0.2820351 |
| 1434441_at   | 1110018J18Rik | RIKEN cDNA 1110018J18 gene                                    | 0.2833026 |
| 1419178_at   | Cd3g          | CD3 antigen, gamma polypeptide                                | 0.2834045 |
| 1455379_at   | Dnali1        | dynein, axonemal, light intermediate polypeptide 1            | 0.2845025 |
| 1445787_at   | 5033413D22Rik | RIKEN cDNA 5033413D22 gene                                    | 0.2848977 |
| 1429366_at   | Lrrc34        | leucine rich repeat containing 34                             | 0.2852993 |
| 1427063_at   | 5330417C22Rik | RIKEN cDNA 5330417C22 gene                                    | 0.2854206 |
| 1440165_at   | Ptprc         | protein tyrosine phosphatase, receptor type, C                | 0.2855004 |
| 1425084_at   | Gimap7        | GTPase, IMAP family member 7                                  | 0.2858245 |
| 1438083_at   | Hhip          | Hedgehog-interacting protein                                  | 0.2858741 |
| 1418741_at   | Itgb7         | integrin beta 7                                               | 0.2860747 |
| 1439808_at   | A130090K04Rik | RIKEN cDNA A130090K04 gene                                    | 0.2864086 |
| 1416713_at   | Tppp3         | tubulin polymerization-promoting protein family member 3      | 0.2868963 |
| 1453496_at   | Fam162b       | family with sequence similarity 162, member B                 | 0.2871668 |
| 1424719_a_at | Mapt          | microtubule-associated protein tau                            | 0.2878359 |
| 1457896_at   | Esrrg         | estrogen-related receptor gamma                               | 0.2882544 |
| 1457170_at   | Lrrc36        | leucine rich repeat containing 36                             | 0.2885028 |
| 1425471_x_at |               |                                                               | 0.2899364 |
| 1454622_at   | Slc38a5       | solute carrier family 38, member 5                            | 0.29036   |
| 1433969_at   | Cdkl4         | cyclin-dependent kinase-like 4                                | 0.2909525 |
| 1450928_at   | Id4           | inhibitor of DNA binding 4                                    | 0.2910873 |
| 1415855_at   | Kitl          | kit ligand                                                    | 0.2919662 |

|              |               |                                                                          |           |
|--------------|---------------|--------------------------------------------------------------------------|-----------|
| 1424324_at   | Esco1         | establishment of cohesion 1 homolog 1 (S. cerevisiae)                    | 0.2924049 |
| 1435343_at   | Dock10        | dedicator of cytokinesis 10                                              | 0.2932318 |
| 1424250_a_at | Arhgef3       | Rho guanine nucleotide exchange factor (GEF) 3                           | 0.2932483 |
| 1446750_at   | Impact        | imprinted and ancient                                                    | 0.2935899 |
| 1455028_at   | Mapt          | microtubule-associated protein tau                                       | 0.2941011 |
| 1452408_at   |               |                                                                          | 0.2944429 |
| 1435906_x_at | Gbp2          | guanylate binding protein 2                                              | 0.2945358 |
| 1452815_at   | P2ry10        | purinergic receptor P2Y, G-protein coupled 10                            | 0.2948227 |
| 1416246_a_at | Coro1a        | coronin, actin binding protein 1A                                        | 0.2949375 |
| 1430534_at   | Rnase6        | ribonuclease, RNase A family, 6                                          | 0.2956707 |
| 1444078_at   | Cd8a          | CD8 antigen, alpha chain                                                 | 0.297194  |
| 1422866_at   | Col13a1       | collagen, type XIII, alpha 1                                             | 0.2972095 |
| 1426505_at   | Evi2a         | ecotropic viral integration site 2a                                      | 0.2972278 |
| 1436576_at   | Fam26f        | family with sequence similarity 26, member F                             | 0.2973393 |
| 1435701_at   |               |                                                                          | 0.2982573 |
| 1433939_at   | Aff3          | AF4/FMR2 family, member 3                                                | 0.2988602 |
| 1422637_at   | Rassf5        | Ras association (RalGDS/AF-6) domain family member 5                     | 0.299008  |
| 1430012_at   | 1110050K14Rik | RIKEN cDNA 1110050K14 gene                                               | 0.2998568 |
| 1438238_at   | 2010315B03Rik | RIKEN cDNA 2010315B03 gene                                               | 0.3007511 |
| 1448029_at   | Tbx3          | T-box 3                                                                  | 0.3009888 |
| 1448529_at   | Thbd          | thrombomodulin                                                           | 0.301501  |
| 1426112_a_at | Cd72          | CD72 antigen                                                             | 0.3018895 |
| 1438676_at   | Mpa2l         | macrophage activation 2 like                                             | 0.3019317 |
| 1418858_at   | Aox3          | aldehyde oxidase 3                                                       | 0.302276  |
| 1416714_at   | Irf8          | interferon regulatory factor 8                                           | 0.3027999 |
| 1426530_a_at | Klh5          | kelch-like 5 (Drosophila)                                                | 0.3028459 |
| 1448737_at   | Tspan7        | tetraspanin 7                                                            | 0.3030256 |
| 1435553_at   | Pdzd2         | PDZ domain containing 2                                                  | 0.303106  |
| 1454824_s_at | Mtus1         | mitochondrial tumor suppressor 1                                         | 0.3037337 |
| 1457401_at   | Dnahc9        | dynein, axonemal, heavy chain 9                                          | 0.3039674 |
| 1447541_s_at | Itgae         | integrin alpha E, epithelial-associated                                  | 0.304077  |
| 1428283_at   | Cyp2s1        | cytochrome P450, family 2, subfamily s, polypeptide 1                    | 0.3042217 |
| 1436941_at   | Fam55c        | family with sequence similarity 55, member C                             | 0.3048734 |
| 1439971_at   | 6330439K17Rik | RIKEN cDNA 6330439K17 gene                                               | 0.3054182 |
| 1419706_a_at | Akap12        | A kinase (PRKA) anchor protein (gravin) 12                               | 0.3054216 |
| 1421923_at   | Sh3bp5        | SH3-domain binding protein 5 (BTK-associated)                            | 0.305642  |
| 1439680_at   | Tnfsf10       | tumor necrosis factor (ligand) superfamily, member 10                    | 0.3059195 |
| 1456907_at   | Cxcl9         | chemokine (C-X-C motif) ligand 9                                         | 0.3061602 |
| 1418240_at   | Gbp2          | guanylate binding protein 2                                              | 0.3066884 |
| 1442122_at   | AI451458      | expressed sequence AI451458                                              | 0.3076404 |
| 1422808_s_at | Dock2         | dedicator of cyto-kinesis 2                                              | 0.3078084 |
| 1424234_s_at | Meox2         | mesenchyme homeobox 2                                                    | 0.3079922 |
| 1436569_at   | Prex2         | phosphatidylinositol-3,4,5-trisphosphate-dependent Rac exchange factor 2 | 0.308188  |

|              |               |                                                              |           |
|--------------|---------------|--------------------------------------------------------------|-----------|
| 1455970_at   | Pde5a         | phosphodiesterase 5A, cGMP-specific                          | 0.3082388 |
| 1420421_s_at | Klrb1b        | killer cell lectin-like receptor subfamily B member 1B       | 0.308401  |
| 1432083_a_at | Lrrc23        | leucine rich repeat containing 23                            | 0.3086615 |
| 1423437_at   | Gsta3         | glutathione S-transferase, alpha 3                           | 0.3088741 |
| 1457376_at   |               |                                                              | 0.3091921 |
| 1453109_at   | Arsk          | arylsulfatase K                                              | 0.3103815 |
| 1448862_at   | Icam2         | intercellular adhesion molecule 2                            | 0.3105682 |
| 1429074_at   | 1700026D08Rik | RIKEN cDNA 1700026D08 gene                                   | 0.3110524 |
| 1460427_a_at | Adam28        | a disintegrin and metallopeptidase domain 28                 | 0.3113792 |
| 1439814_at   | Atp8b4        | ATPase, class I, type 8B, member 4                           | 0.3123684 |
| 1451006_at   | Xdh           | xanthine dehydrogenase                                       | 0.3124572 |
| 1435207_at   | Dixdc1        | DIX domain containing 1                                      | 0.3126235 |
| 1434528_at   | Aard          | alanine and arginine rich domain containing protein          | 0.3128595 |
| 1438122_at   | 2900006K08Rik | RIKEN cDNA 2900006K08 gene                                   | 0.313024  |
| 1443327_at   | D130043K22Rik | RIKEN cDNA D130043K22 gene                                   | 0.3135656 |
| 1456328_at   | Bank1         | B-cell scaffold protein with ankyrin repeats 1               | 0.3136662 |
| 1426159_x_at | Tcrb-J        | T-cell receptor beta, joining region                         | 0.3140646 |
| 1442873_at   |               |                                                              | 0.3140971 |
| 1449498_at   | Marco         | macrophage receptor with collagenous structure               | 0.3146302 |
| 1432075_a_at | Tekt1         | tektin 1                                                     | 0.3148621 |
| 1448786_at   | 1100001H23Rik | RIKEN cDNA 1100001H23 gene                                   | 0.3149896 |
| 1455256_at   | Tnik          | TRAF2 and NCK interacting kinase                             | 0.3152151 |
| 1433743_at   | Dach1         | dachshund 1 (Drosophila)                                     | 0.3153155 |
| 1455872_at   | Fam167a       | family with sequence similarity 167, member A                | 0.3161179 |
| 1424923_at   | Serpina3g     | serine (or cysteine) peptidase inhibitor, clade A, member 3G | 0.3163963 |
| 1424340_at   | Lrrc48        | leucine rich repeat containing 48                            | 0.3164234 |
| 1442331_at   |               |                                                              | 0.3166493 |
| 1459815_at   | Zmynd12       | zinc finger, MYND domain containing 12                       | 0.3174985 |
| 1456061_at   | Gimap8        | GTPase, IMAP family member 8                                 | 0.3175515 |
| 1431079_at   | C1qtnf2       | C1q and tumor necrosis factor related protein 2              | 0.3177207 |
| 1447495_at   | Fank1         | fibronectin type 3 and ankyrin repeat domains 1              | 0.3180075 |
| 1447806_s_at | Srpk3         | serine/arginine-rich protein specific kinase 3               | 0.3184601 |
| 1447927_at   | Mpa2l         | macrophage activation 2 like                                 | 0.3199628 |
| 1420579_s_at | Cfr           | cystic fibrosis transmembrane conductance regulator homolog  | 0.3200102 |
| 1424010_at   | Mfap4         | microfibrillar-associated protein 4                          | 0.3201937 |
| 1424375_s_at | Gimap4        | GTPase, IMAP family member 4                                 | 0.3202721 |
| 1416468_at   | Aldh1a1       | aldehyde dehydrogenase family 1, subfamily A1                | 0.3211727 |
| 1418754_at   | Adcy8         | adenylate cyclase 8                                          | 0.3213064 |
| 1455074_at   | Efcab1        | EF hand calcium binding domain 1                             | 0.3215377 |
| 1450047_at   | Hs6st2        | heparan sulfate 6-O-sulfotransferase 2                       | 0.3219181 |
| 1417171_at   | Itk           | IL2-inducible T-cell kinase                                  | 0.3219902 |
| 1435992_at   | Iqca          | IQ motif containing with AAA domain                          | 0.3222156 |
| 1452352_at   | Ctla2b        | cytotoxic T lymphocyte-associated protein 2 beta             | 0.322433  |
| 1429870_at   | Tnik          | TRAF2 and NCK interacting kinase                             | 0.3225466 |



|              |               |                                                                                        |           |
|--------------|---------------|----------------------------------------------------------------------------------------|-----------|
| 1435361_at   | Sema3g        | sema domain, immunoglobulin domain (Ig), short basic domain, secreted, (semaphorin) 3G | 0.3229102 |
| 1456156_at   | Lepr          | leptin receptor                                                                        | 0.3232095 |
| 1453145_at   | 4933439C20Rik | RIKEN cDNA 4933439C20 gene                                                             | 0.3234425 |
| 1427018_at   | Tsnaxip1      | translin-associated factor X (Tsnax) interacting protein 1                             | 0.3235031 |
| 1441972_at   | Itga1         | integrin alpha 1                                                                       | 0.3236888 |
| 1427486_at   | Ptpnb         | protein tyrosine phosphatase, receptor type, B                                         | 0.3237383 |
| 1441589_at   |               |                                                                                        | 0.3240482 |
| 1437249_at   | Skap1         | src family associated phosphoprotein 1                                                 | 0.3244576 |
| 1417643_at   | Rsph1         | radial spoke head 1 homolog (Chlamydomonas)                                            | 0.3249036 |
| 1442233_at   |               |                                                                                        | 0.3256556 |
| 1439141_at   | Gpr18         | G protein-coupled receptor 18                                                          | 0.3259672 |
| 1419033_at   | Papola        | poly (A) polymerase alpha                                                              | 0.3261546 |
| 1458341_x_at | Pde5a         | phosphodiesterase 5A, cGMP-specific                                                    | 0.3262556 |
| 1435144_at   |               |                                                                                        | 0.3263787 |
| 1420872_at   | Gucy1b3       | guanylate cyclase 1, soluble, beta 3                                                   | 0.3264779 |
| 1418826_at   | Ms4a6b        | membrane-spanning 4-domains, subfamily A, member 6B                                    | 0.3269475 |
| 1442223_at   | Enah          | enabled homolog (Drosophila)                                                           | 0.3269896 |
| 1443161_at   |               |                                                                                        | 0.327397  |
| 1453144_at   | 4933439C20Rik | RIKEN cDNA 4933439C20 gene                                                             | 0.3281794 |
| 1443937_at   |               |                                                                                        | 0.3285007 |
| 1459847_x_at | Gfra2         | glial cell line derived neurotrophic factor family receptor alpha 2                    | 0.3286932 |
| 1427301_at   | Cd48          | CD48 antigen                                                                           | 0.3287478 |
| 1430165_at   | Stk17b        | serine/threonine kinase 17b (apoptosis-inducing)                                       | 0.3291569 |
| 1456472_at   | Armc4         | armadillo repeat containing 4                                                          | 0.3293469 |
| 1449602_at   |               |                                                                                        | 0.3293689 |
| 1442113_at   | 5330417C22Rik | RIKEN cDNA 5330417C22 gene                                                             | 0.3297835 |
| 1434326_x_at | Coro2b        | coronin, actin binding protein, 2B                                                     | 0.3300074 |
| 1448908_at   | Ppap2b        | phosphatidic acid phosphatase type 2B                                                  | 0.3308949 |
| 1447231_at   |               |                                                                                        | 0.3313427 |
| 1435465_at   | Kbtbd11       | kelch repeat and BTB (POZ) domain containing 11                                        | 0.3315864 |
| 1447174_at   |               |                                                                                        | 0.3320599 |
| 1459354_at   |               |                                                                                        | 0.3321307 |
| 1445204_at   |               |                                                                                        | 0.3325926 |
| 1425291_at   | Foxj1         | forkhead box J1                                                                        | 0.3334432 |
| 1417963_at   | Pltp          | phospholipid transfer protein                                                          | 0.3342914 |
| 1451604_a_at | Acvr1l        | activin A receptor, type II-like 1                                                     | 0.3346633 |
| 1421186_at   | Ccr2          | chemokine (C-C motif) receptor 2                                                       | 0.334947  |
| 1416564_at   | Sox7          | SRY-box containing gene 7                                                              | 0.3349945 |
| 1443894_at   | Evi2a         | ecotropic viral integration site 2a                                                    | 0.3351301 |
| 1458229_at   | Robo2         | roundabout homolog 2 (Drosophila)                                                      | 0.336362  |
| 1436037_at   | Itga4         | integrin alpha 4                                                                       | 0.3366796 |
| 1416318_at   | Serpnb1a      | serine (or cysteine) peptidase inhibitor, clade B, member 1a                           | 0.336944  |

|              |               |                                                                     |           |
|--------------|---------------|---------------------------------------------------------------------|-----------|
| 1438183_x_at | Sord          | sorbitol dehydrogenase                                              | 0.3370763 |
| 1456836_at   | Itk           | IL2-inducible T-cell kinase                                         | 0.3371245 |
| 1424037_at   | Itpka         | inositol 1,4,5-trisphosphate 3-kinase A                             | 0.3371329 |
| 1436481_at   | Atp7b         | ATPase, Cu <sup>++</sup> transporting, beta polypeptide             | 0.3374777 |
| 1449175_at   | Gpr65         | G-protein coupled receptor 65                                       | 0.3376103 |
| 1418930_at   | Cxcl10        | chemokine (C-X-C motif) ligand 10                                   | 0.337996  |
| 1454850_at   | Tbc1d10c      | TBC1 domain family, member 10c                                      | 0.3385069 |
| 1437421_at   | 6330509M05Rik | RIKEN cDNA 6330509M05 gene                                          | 0.338692  |
| 1420569_at   | Chad          | chondroadherin                                                      | 0.3387546 |
| 1424800_at   | Enah          | enabled homolog (Drosophila)                                        | 0.3390789 |
| 1429672_at   | 5830407E08Rik | RIKEN cDNA 5830407E08 gene                                          | 0.3400657 |
| 1443137_at   |               |                                                                     | 0.3401667 |
| 1435331_at   | Pyhin1        | pyrin and HIN domain family, member 1                               | 0.3405198 |
| 1418094_s_at | Car4          | carbonic anhydrase 4                                                | 0.3405832 |
| 1452353_at   | Gpr155        | G protein-coupled receptor 155                                      | 0.3406932 |
| 1439753_x_at | Six4          | sine oculis-related homeobox 4 homolog (Drosophila)                 | 0.3408375 |
| 1446569_at   |               |                                                                     | 0.3416205 |
| 1450241_a_at | Evi2a         | ecotropic viral integration site 2a                                 | 0.3428897 |
| 1436367_at   | Ptprb         | protein tyrosine phosphatase, receptor type, B                      | 0.3429514 |
| 1448301_s_at | Serpib1a      | serine (or cysteine) peptidase inhibitor, clade B, member 1a        | 0.3438123 |
| 1452117_a_at | Fyb           | FYN binding protein                                                 | 0.3438223 |
| 1448452_at   | Irf8          | interferon regulatory factor 8                                      | 0.3440471 |
| 1452405_x_at | A130082M07Rik | RIKEN cDNA A130082M07 gene                                          | 0.3443532 |
| 1416411_at   | Gstm2         | glutathione S-transferase, mu 2                                     | 0.3447761 |
| 1439361_at   |               |                                                                     | 0.3448962 |
| 1424374_at   | Gimap4        | GTPase, IMAP family member 4                                        | 0.3454467 |
| 1452348_s_at | Ifi205        | interferon activated gene 205                                       | 0.345461  |
| 1427345_a_at | Sult1a1       | sulfotransferase family 1A, phenol-preferring, member 1             | 0.3455062 |
| 1426288_at   | Lrp4          | low density lipoprotein receptor-related protein 4                  | 0.3456761 |
| 1423436_at   | Gsta3         | glutathione S-transferase, alpha 3                                  | 0.3457551 |
| 1422545_at   | Tbx2          | T-box 2                                                             | 0.3463205 |
| 1460419_a_at | Prkcb         | protein kinase C, beta                                              | 0.3472138 |
| 1422029_at   | Ccl20         | chemokine (C-C motif) ligand 20                                     | 0.3472446 |
| 1434423_at   | Gulp1         | GULP, engulfment adaptor PTB domain containing 1                    | 0.3472725 |
| 1422828_at   | Cd3d          | CD3 antigen, delta polypeptide                                      | 0.3476715 |
| 1441683_at   |               |                                                                     | 0.347776  |
| 1455269_a_at | Coro1a        | coronin, actin binding protein 1A                                   | 0.3481198 |
| 1435229_at   | Gramd1b       | GRAM domain containing 1B                                           | 0.348856  |
| 1435420_at   | Slc4a5        | solute carrier family 4, sodium bicarbonate cotransporter, member 5 | 0.3490031 |
| 1439066_at   | Angpt1        | angiopoietin 1                                                      | 0.3496813 |
| 1451547_at   | Iyd           | iodotyrosine deiodinase                                             | 0.3503344 |

|              |               |                                                                            |           |
|--------------|---------------|----------------------------------------------------------------------------|-----------|
| 1448021_at   | Fam46c        | family with sequence similarity 46, member C                               | 0.351097  |
| 1427996_at   | BC028528      | cDNA sequence BC028528                                                     | 0.351525  |
| 1448330_at   | Gstm1         | glutathione S-transferase, mu 1                                            | 0.3515989 |
| 1425213_at   | Fam81a        | family with sequence similarity 81, member A                               | 0.3518324 |
| 1416111_at   | Cd83          | CD83 antigen                                                               | 0.3519716 |
| 1424965_at   | Lpxn          | leupaxin                                                                   | 0.3519963 |
| 1419135_at   | Ltb           | lymphotoxin B                                                              | 0.3522801 |
| 1444614_x_at | 6430537H07Rik | RIKEN cDNA 6430537H07 gene                                                 | 0.3524195 |
| 1439864_at   | Ccdc40        | coiled-coil domain containing 40                                           | 0.3527031 |
| 1419674_a_at | Dpep1         | dipeptidase 1 (renal)                                                      | 0.3531672 |
| 1453128_at   | Lyve1         | lymphatic vessel endothelial hyaluronan receptor 1                         | 0.353592  |
| 1457917_at   | Lck           | lymphocyte protein tyrosine kinase                                         | 0.3537926 |
| 1425888_at   | Klra17        | killer cell lectin-like receptor, subfamily A, member 17                   | 0.3539178 |
| 1451605_at   | Dyx1c1        | dyslexia susceptibility 1 candidate 1 homolog (human)                      | 0.3542741 |
| 1455279_at   | Gm1060        | gene model 1060, (NCBI)                                                    | 0.354601  |
| 1435959_at   | Arhgap15      | Rho GTPase activating protein 15                                           | 0.3549064 |
| 1429809_at   | Tmtc2         | transmembrane and tetratricopeptide repeat containing 2                    | 0.3558773 |
| 1437282_at   |               |                                                                            | 0.3566568 |
| 1458148_at   | Nlrc3         | NLR family, CARD domain containing 3                                       | 0.356732  |
| 1420534_at   | Gucy1a3       | guanylate cyclase 1, soluble, alpha 3                                      | 0.3572338 |
| 1441531_at   | Plcb4         | phospholipase C, beta 4                                                    | 0.3575731 |
| 1424801_at   | Enah          | enabled homolog (Drosophila)                                               | 0.3575961 |
| 1449081_at   | Ces3          | carboxylesterase 3                                                         | 0.3581743 |
| 1448502_at   | Slc16a7       | solute carrier family 16 (monocarboxylic acid transporters), member 7      | 0.3589877 |
| 1429175_at   | Tmem178       | transmembrane protein 178                                                  | 0.3597659 |
| 1430419_at   | 2310031A07Rik | RIKEN cDNA 2310031A07 gene                                                 | 0.3598194 |
| 1441075_at   | Nostrin       | nitric oxide synthase trafficker                                           | 0.3600452 |
| 1453868_at   | Ccdc11        | coiled-coil domain containing 11                                           | 0.3604075 |
| 1454806_at   | Fam49a        | family with sequence similarity 49, member B                               | 0.3604595 |
| 1455180_at   | Gcom1         | GRINL1A complex locus                                                      | 0.3605443 |
| 1428535_at   | 9430020K01Rik | RIKEN cDNA 9430020K01 gene                                                 | 0.3609048 |
| 1427044_a_at | Amph          | amphiphysin                                                                | 0.3613105 |
| 1416007_at   | Satb1         | special AT-rich sequence binding protein 1                                 | 0.3616661 |
| 1439194_at   | C030048H21Rik | RIKEN cDNA C030048H21 gene                                                 | 0.3618983 |
| 1457797_at   | AI605517      | expressed sequence AI605517                                                | 0.3620942 |
| 1428117_x_at | Dynl1         | dynein light chain Tctex-type 1                                            | 0.3628712 |
| 1445399_at   | Klrb1b        | killer cell lectin-like receptor subfamily B member 1B                     | 0.3631418 |
| 1440840_at   | D630004K10Rik | RIKEN cDNA D630004K10 gene                                                 | 0.3633981 |
| 1424233_at   | Meox2         | mesenchyme homeobox 2                                                      | 0.363777  |
| 1450639_at   | Slc28a2       | solute carrier family 28 (sodium-coupled nucleoside transporter), member 2 | 0.3643618 |
| 1444197_at   | Rinl          | Ras and Rab interactor-like                                                | 0.3643974 |
| 1440685_at   |               |                                                                            | 0.364978  |

|              |               |                                                               |           |
|--------------|---------------|---------------------------------------------------------------|-----------|
| 1449038_at   | Hsd11b1       | hydroxysteroid 11-beta dehydrogenase 1                        | 0.3653389 |
| 1437614_x_at | Zdhhc14       | zinc finger, DHHC domain containing 14                        | 0.3653441 |
| 1427892_at   | Myo1g         | myosin IG                                                     | 0.3664658 |
| 1447792_x_at | Gpr174        | G protein-coupled receptor 174                                | 0.3664741 |
| 1439145_at   | Lck           | lymphocyte protein tyrosine kinase                            | 0.3670471 |
| 1426396_at   | Cd247         | CD247 antigen                                                 | 0.3671197 |
| 1418484_at   | Tekt2         | tektin 2                                                      | 0.3682224 |
| 1456862_at   | Six4          | sine oculis-related homeobox 4 homolog (Drosophila)           | 0.3687269 |
| 1434873_a_at | Centb1        | centaurin, beta 1                                             | 0.3693429 |
| 1441761_at   | Sla           | src-like adaptor                                              | 0.3693442 |
| 1424718_at   | Mapt          | microtubule-associated protein tau                            | 0.36935   |
| 1441353_at   | Nav2          | neuron navigator 2                                            | 0.369547  |
| 1436294_at   | Ankrd29       | ankyrin repeat domain 29                                      | 0.3702332 |
| 1445763_at   | 1700013F07Rik | RIKEN cDNA 1700013F07 gene                                    | 0.3714524 |
| 1429543_at   | 6230424C14Rik | RIKEN cDNA 6230424C14 gene                                    | 0.3718204 |
| 1448557_at   | Fam13c        | family with sequence similarity 13, member C                  | 0.3719149 |
| 1424542_at   | S100a4        | S100 calcium binding protein A4                               | 0.3723421 |
| 1444137_at   | A430108G06Rik | RIKEN cDNA A430108G06 gene                                    | 0.3734828 |
| 1440621_at   |               |                                                               | 0.3737055 |
| 1456033_at   | Tbx4          | T-box 4                                                       | 0.3741465 |
| 1442091_at   |               |                                                               | 0.3746782 |
| 1458974_at   |               |                                                               | 0.3750973 |
| 1460482_at   | 3110047P20Rik | RIKEN cDNA 3110047P20 gene                                    | 0.3754123 |
| 1449049_at   | Tlr1          | toll-like receptor 1                                          | 0.3755282 |
| 1417679_at   | Gfi1          | growth factor independent 1                                   | 0.3755951 |
| 1455292_x_at | Rsl1          | regulator of sex limited protein 1                            | 0.3760322 |
| 1438031_at   | Rasgrp3       | RAS, guanyl releasing protein 3                               | 0.3773002 |
| 1419063_at   | Ugt8a         | UDP galactosyltransferase 8A                                  | 0.3782413 |
| 1420459_at   | Ripply3       | rippy3 homolog (zebrafish)                                    | 0.3784329 |
| 1440229_at   | 2310034G01Rik | RIKEN cDNA 2310034G01 gene                                    | 0.3787338 |
| 1453486_a_at | Scube2        | signal peptide, CUB domain, EGF-like 2                        | 0.3788606 |
| 1445980_at   |               |                                                               | 0.3795571 |
| 1456418_at   | Kcnj13        | potassium inwardly-rectifying channel, subfamily J, member 13 | 0.3799376 |
| 1429842_at   | Mdh1b         | malate dehydrogenase 1B, NAD (soluble)                        | 0.3800601 |
| 1455392_at   | Prr18         | proline rich region 18                                        | 0.3803189 |
| 1420819_at   | Sla           | src-like adaptor                                              | 0.3804063 |
| 1435771_at   | Plcb4         | phospholipase C, beta 4                                       | 0.3808233 |
| 1441317_x_at | Jakmip1       | janus kinase and microtubule interacting protein 1            | 0.380897  |
| 1429673_at   | 5830407E08Rik | RIKEN cDNA 5830407E08 gene                                    | 0.3812698 |
| 1422788_at   | Slc43a3       | solute carrier family 43, member 3                            | 0.3814335 |
| 1446751_s_at | Impact        | imprinted and ancient                                         | 0.3817435 |
| 1456686_at   |               |                                                               | 0.3818491 |
| 1429181_at   | 1700009P17Rik | RIKEN cDNA 1700009P17 gene                                    | 0.3819784 |
| 1416416_x_at | Gstm1         | glutathione S-transferase, mu 1                               | 0.3820974 |
| 1436312_at   | Ikzf1         | IKAROS family zinc finger 1                                   | 0.3822893 |

|              |               |                                                                               |           |
|--------------|---------------|-------------------------------------------------------------------------------|-----------|
| 1417360_at   | Mlh1          | mutL homolog 1 (E. coli)                                                      | 0.3823195 |
| 1429642_at   | Anubl1        | AN1, ubiquitin-like, homolog (Xenopus laevis)                                 | 0.3827888 |
| 1440464_at   | Elavl1        | ELAV (embryonic lethal, abnormal vision, Drosophila)-like 1 (Hu antigen R)    | 0.3841831 |
| 1440695_at   |               |                                                                               | 0.3844298 |
| 1415999_at   | Hey1          | hairy/enhancer-of-split related with YRPW motif 1                             | 0.3845534 |
| 1417414_at   | Sept3         | septin 3                                                                      | 0.3851765 |
| 1439018_at   | Fhdc1         | FH2 domain containing 1                                                       | 0.3852822 |
| 1418489_a_at | Calcl         | calcitonin receptor-like                                                      | 0.3854454 |
| 1436171_at   | Arhgap30      | Rho GTPase activating protein 30                                              | 0.3864568 |
| 1434939_at   | Foxf1a        | forkhead box F1a                                                              | 0.3865404 |
| 1442582_at   | Gcet2         | germinal center expressed transcript 2                                        | 0.3868763 |
| 1433169_at   | 5830456J23Rik | RIKEN cDNA 5830456J23 gene                                                    | 0.3872125 |
| 1424921_at   | Brd4          | bromodomain containing 4                                                      | 0.3876291 |
| 1436285_at   | Ccdc113       | coiled-coil domain containing 113                                             | 0.3879451 |
| 1438532_at   | Hmcn1         | hemicentin 1                                                                  | 0.3882543 |
| 1455618_x_at | Tspan33       | tetraspanin 33                                                                | 0.3884066 |
| 1460255_at   | Tnfsf13b      | tumor necrosis factor (ligand) superfamily, member 13b                        | 0.3884911 |
| 1455080_at   | Ppp1r16b      | protein phosphatase 1, regulatory (inhibitor) subunit 16B                     | 0.3885601 |
| 1442646_at   |               |                                                                               | 0.389364  |
| 1446426_at   |               |                                                                               | 0.38977   |
| 1452892_at   | Stk33         | serine/threonine kinase 33                                                    | 0.3901631 |
| 1422542_at   | Gpr34         | G protein-coupled receptor 34                                                 | 0.3901823 |
| 1417702_a_at | Hnmt          | histamine N-methyltransferase                                                 | 0.3902754 |
| 1455771_at   | Bzap1         | benzodiazapine receptor associated protein 1                                  | 0.3905792 |
| 1446140_at   |               |                                                                               | 0.3907806 |
| 1419334_at   | Ctla4         | cytotoxic T-lymphocyte-associated protein 4                                   | 0.3911456 |
| 1448729_a_at | sept-4        | septin 4                                                                      | 0.3918004 |
| 1457541_at   | Akap14        | A kinase (PRKA) anchor protein 14                                             | 0.3920394 |
| 1436814_at   | 1810010D01Rik | RIKEN cDNA 1810010D01 gene                                                    | 0.3921713 |
| 1426208_x_at | Plagl1        | pleiomorphic adenoma gene-like 1                                              | 0.3922748 |
| 1440305_at   |               |                                                                               | 0.3927009 |
| 1437356_at   | Gpr183        | G protein-coupled receptor 183                                                | 0.392849  |
| 1437176_at   | Nlrc5         | NLR family, CARD domain containing 5                                          | 0.3929818 |
| 1450521_a_at | Tcrg-V4       | T-cell receptor gamma, variable 4                                             | 0.3931745 |
| 1438027_at   |               |                                                                               | 0.3934834 |
| 1418582_at   | Cbfa2t3       | core-binding factor, runt domain, alpha subunit 2, translocated to, 3 (human) | 0.3942685 |
| 1457094_at   | She           | src homology 2 domain-containing transforming protein E                       | 0.3944487 |
| 1434929_at   | BC035044      | cDNA sequence BC035044                                                        | 0.3946678 |
| 1429452_x_at | 4933439C20Rik | RIKEN cDNA 4933439C20 gene                                                    | 0.3951526 |
| 1427034_at   | Ace           | angiotensin I converting enzyme (peptidyl-dipeptidase A) 1                    | 0.3951553 |
| 1423259_at   | Id4           | inhibitor of DNA binding 4                                                    | 0.3952751 |
| 1417496_at   | Cp            | ceruloplasmin                                                                 | 0.3961175 |

|              |               |                                                                              |           |
|--------------|---------------|------------------------------------------------------------------------------|-----------|
| 1445837_at   |               |                                                                              | 0.3961865 |
| 1450033_a_at | Stat1         | signal transducer and activator of transcription 1                           | 0.3965303 |
| 1448545_at   | Sdc2          | syndecan 2                                                                   | 0.396615  |
| 1436876_at   | Rgs7bp        | regulator of G-protein signalling 7 binding protein                          | 0.3966554 |
| 1440472_at   | Spag17        | sperm associated antigen 17                                                  | 0.3966625 |
| 1420515_a_at | Pglyrp2       | peptidoglycan recognition protein 2                                          | 0.3972035 |
| 1420659_at   | Slamf6        | SLAM family member 6                                                         | 0.3973039 |
| 1426951_at   | Crim1         | cysteine rich transmembrane BMP regulator 1 (chordin like)                   | 0.397672  |
| 1435261_at   | 4732416N19Rik | RIKEN cDNA 4732416N19 gene                                                   | 0.3982582 |
| 1419907_s_at | Fcrla         | Fc receptor-like A                                                           | 0.398321  |
| 1448117_at   | Kitl          | kit ligand                                                                   | 0.3985417 |
| 1422727_at   | Nme5          | non-metastatic cells 5, protein expressed in (nucleoside-diphosphate kinase) | 0.3986362 |
| 1438310_at   |               |                                                                              | 0.398742  |
| 1449235_at   | Fasl          | Fas ligand (TNF superfamily, member 6)                                       | 0.3992008 |
| 1452904_at   | 1700026L06Rik | RIKEN cDNA 1700026L06 gene                                                   | 0.3996634 |
| 1459536_at   | Calcr1        | calcitonin receptor-like                                                     | 0.3998518 |
| 1459913_at   | Tnfsf10       | tumor necrosis factor (ligand) superfamily, member 10                        | 0.3999482 |
| 1418394_a_at | Cd97          | CD97 antigen                                                                 | 0.3999959 |
| 1423478_at   | Prkcb         | protein kinase C, beta                                                       | 0.4000875 |
| 1441979_at   | BC060267      | cDNA sequence BC060267                                                       | 0.4006435 |
| 1434295_at   | Rasgrp1       | RAS guanyl releasing protein 1                                               | 0.4010133 |
| 1449988_at   | Gimap1        | GTPase, IMAP family member 1                                                 | 0.4010438 |
| 1441887_x_at | EG622976      | predicted gene, EG622976                                                     | 0.4010569 |
| 1455132_at   | A430107D22Rik | RIKEN cDNA A430107D22 gene                                                   | 0.4012836 |
| 1439906_at   |               |                                                                              | 0.4017941 |
| 1460218_at   | Cd52          | CD52 antigen                                                                 | 0.4021589 |
| 1434647_at   | Egflam        | EGF-like, fibronectin type III and laminin G domains                         | 0.4025256 |
| 1419510_at   | Es22          | esterase 22                                                                  | 0.402904  |
| 1422953_at   | Fpr2          | formyl peptide receptor 2                                                    | 0.4029205 |
| 1419858_at   |               |                                                                              | 0.4029358 |
| 1421101_a_at | Ldb2          | LIM domain binding 2                                                         | 0.4030268 |
| 1436172_at   | Samd9l        | sterile alpha motif domain containing 9-like                                 | 0.4033177 |
| 1419188_s_at | Ccl27a        | chemokine (C-C motif) ligand 27A                                             | 0.4035886 |
| 1458362_at   | D730005E14Rik | RIKEN cDNA D730005E14 gene                                                   | 0.4044992 |
| 1456766_at   | Ccdc151       | coiled-coil domain containing 151                                            | 0.404798  |
| 1418776_at   | 5830443L24Rik | RIKEN cDNA 5830443L24 gene                                                   | 0.4050712 |
| 1427325_s_at | Akna          | AT-hook transcription factor                                                 | 0.4054466 |
| 1416255_at   | Gja4          | gap junction protein, alpha 4                                                | 0.4055285 |
| 1440481_at   | Stat1         | signal transducer and activator of transcription 1                           | 0.405716  |
| 1426832_at   | Ddx26b        | DEAD/H (Asp-Glu-Ala-Asp/His) box polypeptide 26B                             | 0.4060351 |
| 1424029_at   | Tspyl4        | TSPY-like 4                                                                  | 0.4060712 |
| 1419306_at   | Ccdc96        | coiled-coil domain containing 96                                             | 0.4063573 |
| 1438975_x_at | Zdhhc14       | zinc finger, DHHC domain containing 14                                       | 0.4066659 |

|              |               |                                                                      |           |
|--------------|---------------|----------------------------------------------------------------------|-----------|
| 1436821_at   | Plcxd3        | phosphatidylinositol-specific phospholipase C, X domain containing 3 | 0.4067374 |
| 1417391_a_at | Il16          | interleukin 16                                                       | 0.406839  |
| 1440808_x_at | Cd163l1       | CD163 molecule-like 1                                                | 0.4070005 |
| 1429514_at   | Ppap2b        | phosphatidic acid phosphatase type 2B                                | 0.4072513 |
| 1436815_x_at | 1810010D01Rik | RIKEN cDNA 1810010D01 gene                                           | 0.4073937 |
| 1421188_at   | Ccr2          | chemokine (C-C motif) receptor 2                                     | 0.4074455 |
| 1449591_at   | Casp4         | caspase 4, apoptosis-related cysteine peptidase                      | 0.4076543 |
| 1420660_at   | Lrrc6         | leucine rich repeat containing 6 (testis)                            | 0.4081963 |
| 1440798_x_at | Lrrc6         | leucine rich repeat containing 6 (testis)                            | 0.4087499 |
| 1418204_s_at | Aif1          | allograft inflammatory factor 1                                      | 0.4091072 |
| 1436593_at   | 1700016K19Rik | RIKEN cDNA 1700016K19 gene                                           | 0.4093109 |
| 1439843_at   | Camk4         | calcium/calmodulin-dependent protein kinase IV                       | 0.4095071 |
| 1455422_x_at | sept-4        | septin 4                                                             | 0.4098665 |
| 1451567_a_at | Ifi203        | interferon activated gene 203                                        | 0.4099731 |
| 1437015_x_at | Pla2g1b       | phospholipase A2, group IB, pancreas                                 | 0.4102734 |
| 1425890_at   | Ly6i          | lymphocyte antigen 6 complex, locus I                                | 0.4114638 |
| 1435378_at   | 2210020M01Rik | RIKEN cDNA 2210020M01 gene                                           | 0.411502  |
| 1425335_at   | Cd8a          | CD8 antigen, alpha chain                                             | 0.4132922 |
| 1417470_at   | Apobec3       | apolipoprotein B mRNA editing enzyme, catalytic polypeptide 3        | 0.4134449 |
| 1458607_at   |               |                                                                      | 0.4138064 |
| 1426044_a_at | Prkcq         | protein kinase C, theta                                              | 0.4144725 |
| 1451506_at   | Mef2c         | myocyte enhancer factor 2C                                           | 0.4147259 |
| 1449078_at   | St3gal6       | ST3 beta-galactoside alpha-2,3-sialyltransferase 6                   | 0.4151709 |
| 1434380_at   | Gbp6          | guanylate binding protein 6                                          | 0.416065  |
| 1439557_s_at | Ldb2          | LIM domain binding 2                                                 | 0.4162404 |
| 1441418_at   |               |                                                                      | 0.4163871 |
| 1433626_at   | Plscr4        | phospholipid scramblase 4                                            | 0.4171266 |
| 1460014_at   | Trem14        | triggering receptor expressed on myeloid cells-like 4                | 0.4176092 |
| 1438324_at   | 9330182L06Rik | RIKEN cDNA 9330182L06 gene                                           | 0.4176779 |
| 1429224_at   | Pnma1         | paraneoplastic antigen MA1                                           | 0.4181819 |
| 1444470_x_at |               |                                                                      | 0.418325  |
| 1419315_at   | Slamf9        | SLAM family member 9                                                 | 0.4183554 |
| 1419043_a_at | ligp1         | interferon inducible GTPase 1                                        | 0.4192    |
| 1448409_at   | Lrmp          | lymphoid-restricted membrane protein                                 | 0.4197214 |
| 1435825_at   | Acvrl1        | activin A receptor, type II-like 1                                   | 0.4201616 |
| 1439589_at   |               |                                                                      | 0.4204506 |
| 1441445_at   | Per3          | period homolog 3 (Drosophila)                                        | 0.4212391 |
| 1453913_a_at | Tap2          | transporter 2, ATP-binding cassette, sub-family B (MDR/TAP)          | 0.4218411 |
| 1453429_at   | EG665787      | predicted gene, EG665787                                             | 0.4221652 |
| 1444426_at   | Cass4         | Cas scaffolding protein family member 4                              | 0.4223024 |
| 1446440_at   |               |                                                                      | 0.4225084 |
| 1422889_at   | Pcdh18        | protocadherin 18                                                     | 0.4225888 |
| 1434793_at   | Wdr78         | WD repeat domain 78                                                  | 0.422951  |

|              |                    |                                                                          |           |
|--------------|--------------------|--------------------------------------------------------------------------|-----------|
| 1426574_a_at | Add3               | adducin 3 (gamma)                                                        | 0.4233088 |
| 1429524_at   | Myo1f              | myosin IF                                                                | 0.4236711 |
| 1440811_x_at | Cd8a               | CD8 antigen, alpha chain                                                 | 0.4237896 |
| 1422620_s_at | Ppap2a             | phosphatidic acid phosphatase type 2A                                    | 0.4238665 |
| 1441109_at   | 5430414B12Rik      | RIKEN cDNA 5430414B12 gene                                               | 0.4242011 |
| 1419762_at   | Ubd                | ubiquitin D                                                              | 0.4249814 |
| 1443026_at   |                    |                                                                          | 0.425149  |
| 1444283_at   | Gimap7             | GTPase, IMAP family member 7                                             | 0.4254331 |
| 1423672_at   | Ttc30b             | tetratricopeptide repeat domain 30B                                      | 0.4256976 |
| 1420955_at   | Vsnl1              | visinin-like 1                                                           | 0.426135  |
| 1455747_at   | Ggt5               | gamma-glutamyltransferase 5                                              | 0.4264036 |
| 1421917_at   | Pdgfra             | platelet derived growth factor receptor, alpha polypeptide               | 0.4265393 |
| 1419567_at   | Fank1              | fibronectin type 3 and ankyrin repeat domains 1                          | 0.427273  |
| 1455150_at   | Hecw2              | HECT, C2 and WW domain containing E3 ubiquitin protein ligase 2          | 0.4272734 |
| 1426640_s_at | Trib2              | tribbles homolog 2 (Drosophila)                                          | 0.4273303 |
| 1453121_at   | Tekt4              | tektin 4                                                                 | 0.4273835 |
| 1455251_at   | Itga1              | integrin alpha 1                                                         | 0.4274506 |
| 1427287_s_at | Itpr2              | inositol 1,4,5-triphosphate receptor 2                                   | 0.4278517 |
| 1418392_a_at | Gbp3               | guanylate binding protein 3                                              | 0.4281599 |
| 1417497_at   | Cp                 | ceruloplasmin                                                            | 0.4289605 |
| 1417803_at   | 1110032A04Rik      | RIKEN cDNA 1110032A04 gene                                               | 0.4289614 |
| 1419810_x_at | Arhgap9            | Rho GTPase activating protein 9                                          | 0.4292459 |
| 1441165_s_at | Clstn2             | calsyntenin 2                                                            | 0.4294201 |
| 1441375_at   |                    |                                                                          | 0.429928  |
| 1433490_s_at | Epb4.1l2           | erythrocyte protein band 4.1-like 2                                      | 0.4299556 |
| 1451053_a_at | Mdm1               | transformed mouse 3T3 cell double minute 1                               | 0.4301851 |
| 1435426_s_at | Pisd               | phosphatidylserine decarboxylase                                         | 0.4302888 |
| 1436999_at   | 5033414K04Rik      | RIKEN cDNA 5033414K04 gene                                               | 0.430417  |
| 1449473_s_at | Cd40               | CD40 antigen                                                             | 0.4306102 |
| 1437221_at   | Rrm2b              | ribonucleotide reductase M2 B (TP53 inducible)                           | 0.4307159 |
| 1437361_at   | OTTMUSG00000002043 | predicted gene, OTTMUSG00000002043                                       | 0.4311567 |
| 1420723_at   | Vnn3               | vanin 3                                                                  | 0.4311836 |
| 1434069_at   | Prex1              | phosphatidylinositol-3,4,5-trisphosphate-dependent Rac exchange factor 1 | 0.4313307 |
| 1426285_at   | Lama2              | laminin, alpha 2                                                         | 0.4315086 |
| 1424443_at   | Tm6sf1             | transmembrane 6 superfamily member 1                                     | 0.4316091 |
| 1418990_at   | Ms4a4d             | membrane-spanning 4-domains, subfamily A, member 4D                      | 0.4317889 |
| 1438658_a_at | S1pr3              | sphingosine-1-phosphate receptor 3                                       | 0.4318608 |
| 1435682_at   | Lars2              | leucyl-tRNA synthetase, mitochondrial                                    | 0.4320178 |
| 1419392_at   | Pclo               | piccolo (presynaptic cytomatrix protein)                                 | 0.4321385 |
| 1422701_at   | Zap70              | zeta-chain (TCR) associated protein kinase                               | 0.4322176 |
| 1417872_at   | Fhl1               | four and a half LIM domains 1                                            | 0.4328898 |
| 1439221_s_at | Cd40               | CD40 antigen                                                             | 0.4336556 |
| 1419300_at   | Flt1               | FMS-like tyrosine kinase 1                                               | 0.4337058 |



|              |               |                                                                                          |           |
|--------------|---------------|------------------------------------------------------------------------------------------|-----------|
| 1443447_at   |               |                                                                                          | 0.4338238 |
| 1441068_at   | A130001G05Rik | RIKEN cDNA A130001G05 gene                                                               | 0.4340536 |
| 1442862_at   | Ccdc88c       | coiled-coil domain containing 88C                                                        | 0.4340677 |
| 1422904_at   | Fmo2          | flavin containing monooxygenase 2                                                        | 0.4342103 |
| 1460601_at   | Myrip         | myosin VIIA and Rab interacting protein                                                  | 0.4345251 |
| 1436502_at   | Mtus1         | mitochondrial tumor suppressor 1                                                         | 0.4347563 |
| 1438705_at   | Cbfa2t3       | core-binding factor, runt domain, alpha subunit 2, translocated to, 3 (human)            | 0.4348758 |
| 1419697_at   | Cxcl11        | chemokine (C-X-C motif) ligand 11                                                        | 0.4353317 |
| 1423410_at   | Meig1         | meiosis expressed gene 1                                                                 | 0.4367576 |
| 1422638_s_at | Rassf5        | Ras association (RalGDS/AF-6) domain family member 5                                     | 0.436807  |
| 1444092_at   | 9430025M13Rik | RIKEN cDNA 9430025M13 gene                                                               | 0.4368493 |
| 1440244_at   | Erg           | avian erythroblastosis virus E-26 (v-ets) oncogene related                               | 0.4371984 |
| 1456331_at   | 9130023H24Rik | RIKEN cDNA 9130023H24 gene                                                               | 0.4374999 |
| 1421930_at   | Icos          | inducible T-cell co-stimulator                                                           | 0.4375421 |
| 1435560_at   | Irgal         | integrin alpha L                                                                         | 0.4375805 |
| 1416016_at   | Psmb9         | proteasome (prosome, macropain) subunit, beta type 9 (large multifunctional peptidase 2) | 0.4377748 |
| 1431074_a_at | Pitpnc1       | phosphatidylinositol transfer protein, cytoplasmic 1                                     | 0.4383556 |
| 1420404_at   | Cd86          | CD86 antigen                                                                             | 0.4386731 |
| 1443448_x_at |               |                                                                                          | 0.4392674 |
| 1445404_at   | Kif27         | kinesin family member 27                                                                 | 0.4393431 |
| 1457177_at   |               |                                                                                          | 0.4395005 |
| 1448147_at   | Tnfrsf19      | tumor necrosis factor receptor superfamily, member 19                                    | 0.439661  |
| 1422124_a_at | Ptprc         | protein tyrosine phosphatase, receptor type, C                                           | 0.4397988 |
| 1456621_at   | Fam13a        | family with sequence similarity 13, member A                                             | 0.43981   |
| 1434621_at   | Tmem204       | transmembrane protein 204                                                                | 0.4400843 |
| 1435353_a_at | Sfi1          | Sfi1 homolog, spindle assembly associated (yeast)                                        | 0.4402787 |
| 1423213_at   | Plxnc1        | plexin C1                                                                                | 0.4405444 |
| 1452592_at   | Mgst2         | microsomal glutathione S-transferase 2                                                   | 0.4406489 |
| 1442276_at   |               |                                                                                          | 0.4409439 |
| 1452249_at   | Prickle1      | prickle like 1 (Drosophila)                                                              | 0.4428126 |
| 1450570_a_at | Cd19          | CD19 antigen                                                                             | 0.4428733 |
| 1420377_at   | St8sia2       | ST8 alpha-N-acetyl-neuraminide alpha-2,8-sialyltransferase 2                             | 0.4430883 |
| 1445561_at   |               |                                                                                          | 0.4434932 |
| 1425436_x_at | Klra9         | killer cell lectin-like receptor subfamily A, member 9                                   | 0.4436236 |
| 1458134_at   |               |                                                                                          | 0.4438554 |
| 1449556_at   | H2-T23        | histocompatibility 2, T region locus 23                                                  | 0.4439199 |
| 1450696_at   | Psmb9         | proteasome (prosome, macropain) subunit, beta type 9 (large multifunctional peptidase 2) | 0.4441769 |
| 1442411_at   |               |                                                                                          | 0.4443201 |
| 1448713_at   | Stat4         | signal transducer and activator of transcription 4                                       | 0.4444766 |
| 1441708_at   | Spag16        | sperm associated antigen 16                                                              | 0.4448274 |

|              |                    |                                                              |           |
|--------------|--------------------|--------------------------------------------------------------|-----------|
| 1422653_at   | Cep70              | centrosomal protein 70                                       | 0.4448943 |
| 1419588_at   | Spag1              | sperm associated antigen 1                                   | 0.4476809 |
| 1428751_at   | Pacrg              | PARK2 co-regulated                                           | 0.4477048 |
| 1443643_at   |                    |                                                              | 0.4477783 |
| 1417676_a_at | Ptpro              | protein tyrosine phosphatase, receptor type, O               | 0.4484943 |
| 1416296_at   | Il2rg              | interleukin 2 receptor, gamma chain                          | 0.4494903 |
| 1434539_at   | Lrrn3              | leucine rich repeat protein 3, neuronal                      | 0.4496577 |
| 1455271_at   | OTTMUSG00000014994 | predicted gene, OTTMUSG00000014994                           | 0.4500313 |
| 1444214_at   | Tubb1              | tubulin, beta 1                                              | 0.4502682 |
| 1430579_at   | Tnik               | TRAF2 and NCK interacting kinase                             | 0.4504968 |
| 1425102_a_at | Ace2               | angiotensin I converting enzyme (peptidyl-dipeptidase A) 2   | 0.450573  |
| 1435066_at   | Pitpnc1            | phosphatidylinositol transfer protein, cytoplasmic 1         | 0.4511727 |
| 1446476_at   | Tcra               | T-cell receptor alpha chain                                  | 0.4512633 |
| 1439761_x_at | D830026I12Rik      | RIKEN cDNA D830026I12 gene                                   | 0.4514473 |
| 1424208_at   | Ptger4             | prostaglandin E receptor 4 (subtype EP4)                     | 0.4518313 |
| 1437064_at   | Ar                 | androgen receptor                                            | 0.4524603 |
| 1419186_a_at | St8sia4            | ST8 alpha-N-acetyl-neuraminide alpha-2,8-sialyltransferase 4 | 0.4537179 |
| 1436570_at   |                    |                                                              | 0.4549251 |
| 1441629_at   |                    |                                                              | 0.4550529 |
| 1437025_at   | Cd28               | CD28 antigen                                                 | 0.4550764 |
| 1460651_at   | Lat                | linker for activation of T cells                             | 0.4569666 |
| 1422730_at   | Limd1              | LIM domains containing 1                                     | 0.4571705 |
| 1443783_x_at | H2-Aa              | histocompatibility 2, class II antigen A, alpha              | 0.4587491 |
| 1447788_s_at | Tspyl3             | TSPY-like 3                                                  | 0.4595612 |
| 1436787_x_at | 1110069O07Rik      | RIKEN cDNA 1110069O07 gene                                   | 0.4613067 |

**Supplemental Table 2. Human Lung Adenocarcinoma Patient Characteristics**

|                       | Non-Invasive AC | Invasive AC    |
|-----------------------|-----------------|----------------|
| Patients              | 17              | 23             |
| Age                   | 67 (10) (53-90) | 67 (8) (57-88) |
| Sex (female)          | 15 (88%)        | 15 (65%)       |
| <u>T Stage</u>        |                 |                |
| 1A                    | 12              | 8              |
| 1B                    | 2               | 3              |
| 2A                    | 1               | 11             |
| 3                     | 2               |                |
| 4                     |                 | 1              |
| <u>N Stage</u>        |                 |                |
| 0                     | 17              | 18             |
| 1                     |                 | 1              |
| 2                     |                 | 4              |
| 3                     |                 |                |
| <u>Stage Grouping</u> |                 |                |
| IA                    | 14              | 9              |
| IB                    | 1               | 8              |
| IIA                   |                 | 1              |
| IIB                   | 2               |                |
| IIIA                  |                 | 5              |
| IIIB                  |                 |                |

**Supplemental Table 3. Biological Process Ontology for Mouse *KrasTgfb2*<sup>-/-</sup> Mouse Tumor Signature Genes**

A GO Biological Process group was considered to be significantly differentially regulated between *KrasTbr2*<sup>-/-</sup> and *KrasTgfb2*<sup>WT</sup> tumors if the Fisher (LS) statistic and the Kolmogorov-Smirnov (KS) statistic p values were less than 0.00001 and the Efron-Tibshirani's GSA test P-value was less than 0.005.

| GO category | GO term                                                                                                                                 | Number of genes |
|-------------|-----------------------------------------------------------------------------------------------------------------------------------------|-----------------|
| GO:0001816  | cytokine production                                                                                                                     | 97              |
| GO:0001817  | regulation of cytokine production                                                                                                       | 67              |
| GO:0002697  | regulation of immune effector process                                                                                                   | 57              |
| GO:0002703  | regulation of leukocyte mediated immunity                                                                                               | 48              |
| GO:0002706  | regulation of lymphocyte mediated immunity                                                                                              | 46              |
| GO:0002819  | regulation of adaptive immune response                                                                                                  | 42              |
| GO:0002822  | regulation of adaptive immune response based on somatic recombination of immune receptors built from immunoglobulin superfamily domains | 42              |
| GO:0002828  | regulation of T-helper 2 type immune response                                                                                           | 5               |
| GO:0007398  | ectoderm development                                                                                                                    | 73              |
| GO:0008544  | epidermis development                                                                                                                   | 69              |
| GO:0016052  | carbohydrate catabolic process                                                                                                          | 61              |
| GO:0030217  | T cell differentiation                                                                                                                  | 86              |
| GO:0031294  | lymphocyte costimulation                                                                                                                | 9               |
| GO:0042035  | regulation of cytokine biosynthetic process                                                                                             | 32              |
| GO:0042089  | cytokine biosynthetic process                                                                                                           | 42              |
| GO:0042092  | T-helper 2 type immune response                                                                                                         | 5               |
| GO:0042098  | T cell proliferation                                                                                                                    | 57              |
| GO:0042102  | positive regulation of T cell proliferation                                                                                             | 25              |
| GO:0042107  | cytokine metabolic process                                                                                                              | 42              |
| GO:0042108  | positive regulation of cytokine biosynthetic process                                                                                    | 16              |
| GO:0042129  | regulation of T cell proliferation                                                                                                      | 36              |
| GO:0043370  | regulation of CD4-positive, alpha beta T cell differentiation                                                                           | 7               |
| GO:0043372  | positive regulation of CD4-positive, alpha beta T cell differentiation                                                                  | 7               |
| GO:0045058  | T cell selection                                                                                                                        | 21              |
| GO:0045191  | regulation of isotype switching                                                                                                         | 12              |
| GO:0045577  | regulation of B cell differentiation                                                                                                    | 14              |
| GO:0045619  | regulation of lymphocyte differentiation                                                                                                | 44              |

|            |                                                    |    |
|------------|----------------------------------------------------|----|
| GO:0045844 | positive regulation of striated muscle development | 9  |
| GO:0046631 | alpha-beta T cell activation                       | 40 |
| GO:0048291 | isotype switching to IgG isotypes                  | 10 |
| GO:0048302 | regulation of isotype switching to IgG isotypes    | 10 |
| GO:0048636 | positive regulation of muscle development          | 9  |
| GO:0050673 | epithelial cell proliferation                      | 37 |
| GO:0050863 | regulation of T cell activation                    | 70 |
| GO:0050870 | positive regulation of T cell activation           | 54 |

**Supplemental Table 4. *KrasTgfb2*<sup>-/-</sup> five-week Mouse Stroma Signature Genes**

**Upregulated and Downregulated vs. nine-week *KrasTgfb2*<sup>WT</sup> Stroma.**

Genes UP in *KrasTgfb2*<sup>-/-</sup> STROMA, sorted by Fold-change (all P<.01, FDR < 25%)

| Probe set    | Gene symbol | Description                                                                                    | Fold-change |
|--------------|-------------|------------------------------------------------------------------------------------------------|-------------|
| 1449526_a_at | Gdpd3       | glycerophosphodiester phosphodiesterase domain containing 3                                    | 237.26      |
| 1457769_at   | H60a        | histocompatibility 60a                                                                         | 137.90      |
| 1424509_at   | Cd177       | CD177 antigen                                                                                  | 115.82      |
| 1449088_at   | Fbp2        | fructose biphosphatase 2                                                                       | 81.29       |
| 1455627_at   | Col8a1      | collagen, type VIII, alpha 1                                                                   | 79.75       |
| 1420549_at   | Gbp1        | guanylate binding protein 1                                                                    | 70.84       |
| 1422571_at   | Thbs2       | thrombospondin 2                                                                               | 70.10       |
| 1450344_a_at | Ptger3      | prostaglandin E receptor 3 (subtype EP3)                                                       | 63.96       |
| 1419549_at   | Arg1        | arginase, liver                                                                                | 63.15       |
| 1450618_a_at | Sprr2a      | small proline-rich protein 2A                                                                  | 59.88       |
| 1418724_at   | Cfi         | complement component factor                                                                    | 53.30       |
| 1420512_at   | Dkk2        | dickkopf homolog 2 ( <i>Xenopus laevis</i> )                                                   | 52.82       |
| 1440145_at   | H60a        | histocompatibility 60a                                                                         | 46.61       |
| 1416676_at   | Kng1        | kininogen 1                                                                                    | 45.60       |
| 1438148_at   | Cxcl3       | chemokine (C-X-C motif) ligand 3                                                               | 44.16       |
| 1416658_at   | Frzb        | frizzled-related protein                                                                       | 43.84       |
| 1452968_at   | Cthrc1      | collagen triple helix repeat containing 1                                                      | 39.40       |
| 1449906_at   | Selp        | selectin, platelet                                                                             | 39.36       |
| 1417795_at   | Chl1        | cell adhesion molecule with homology to L1CAM                                                  | 36.68       |
| 1418207_at   | Fxyd4       | FXYP domain-containing ion transport regulator 4                                               | 35.02       |
| 1449133_at   | Sprr1a      | small proline-rich protein 1A                                                                  | 34.99       |
| 1421365_at   | Fst         | follistatin                                                                                    | 34.95       |
| 1419082_at   | Serpib2     | serine (or cysteine) peptidase inhibitor, clade B, member 2                                    | 33.39       |
| 1418440_at   | Col8a1      | collagen, type VIII, alpha 1                                                                   | 30.67       |
| 1449984_at   | Cxcl2       | chemokine (C-X-C motif) ligand 2                                                               | 27.05       |
| 1439827_at   | Adams12     | a disintegrin-like and metallopeptidase (reprolysin type) with thrombospondin type 1 motif, 12 | 25.65       |
| 1449254_at   | Spp1        | secreted phosphoprotein 1                                                                      | 22.58       |
| 1439016_x_at | Sprr2a      | small proline-rich protein 2A                                                                  | 22.45       |
| 1449033_at   | Tnfrsf11b   | tumor necrosis factor receptor superfamily, member 11b (osteoprotegerin)                       | 22.42       |
| 1450663_at   | Thbs2       | thrombospondin 2                                                                               | 20.49       |
| 1425182_x_at |             |                                                                                                | 19.22       |
| 1440173_x_at | Selp        | selectin, platelet                                                                             | 18.79       |
| 1421134_at   | Areg        | amphiregulin                                                                                   | 17.72       |
| 1420330_at   | Clec4e      | C-type lectin domain family 4, member e                                                        | 17.29       |
| 1419130_at   | Adat2       | adenosine deaminase, tRNA-specific 2, TAD2 homolog ( <i>S. cerevisiae</i> )                    | 17.20       |
| 1424885_at   | Klhc8a      | kelch domain containing 8A                                                                     | 16.82       |
| 1422643_at   | Moxd1       | monooxygenase, DBH-like 1                                                                      | 16.72       |
| 1449166_at   | S100a14     | S100 calcium binding protein A14                                                               | 16.62       |
| 1434877_at   | Nptx1       | neuronal pentraxin 1                                                                           | 14.98       |

|              |                   |                                                                                          |       |
|--------------|-------------------|------------------------------------------------------------------------------------------|-------|
| 1457827_at   | Arsj              | arylsulfatase J                                                                          | 14.57 |
| 1455649_at   | Ttc9              | tetratricopeptide repeat domain 9                                                        | 14.47 |
| 1429841_at   | Megf10            | multiple EGF-like-domains 10                                                             | 14.24 |
| 1449153_at   | Mmp12             | matrix metalloproteinase 12                                                              | 13.82 |
| 1422324_a_at | Pthlh             | parathyroid hormone-like peptide                                                         | 13.56 |
| 1451899_a_at | Gtf2ird1          | general transcription factor II I repeat domain-containing 1                             | 12.94 |
| 1434817_s_at | Rprd2             | regulation of nuclear pre-mRNA domain containing 2                                       | 12.26 |
| 1442279_at   |                   |                                                                                          | 12.02 |
| 1445824_at   | Zfp458            | zinc finger protein 458                                                                  | 11.87 |
| 1435190_at   | Chl1              | cell adhesion molecule with homology to L1CAM                                            | 11.76 |
| 1434275_at   | Nkd2              | naked cuticle 2 homolog (Drosophila)                                                     | 11.58 |
| 1460259_s_at |                   |                                                                                          | 11.54 |
| 1423367_at   | Wnt7a             | wingless-related MMTV integration site 7A                                                | 11.28 |
| 1424966_at   | Tmem40            | transmembrane protein 40                                                                 | 11.28 |
| 1460285_at   | Itga9             | integrin alpha 9                                                                         | 11.05 |
| 1425191_at   | Ocel1             | occludin/ELL domain containing 1                                                         | 10.93 |
| 1447862_x_at | Thbs2             | thrombospondin 2                                                                         | 10.91 |
| 1415803_at   | Cx3cl1            | chemokine (C-X3-C motif) ligand 1                                                        | 10.84 |
| 1434458_at   | Fst               | follicle-stimulating hormone                                                             | 10.70 |
| 1443682_at   |                   |                                                                                          | 10.68 |
| 1416103_at   | Ywhaz             | tyrosine 3-monooxygenase/tryptophan 5-monooxygenase activation protein, zeta polypeptide | 10.58 |
| 1458268_s_at | Igfbp3            | insulin-like growth factor binding protein 3                                             | 10.44 |
| 1435323_a_at | Mboat1            | membrane bound O-acyltransferase domain containing 1                                     | 10.27 |
| 1429273_at   | Bmper             | BMP-binding endothelial regulator                                                        | 10.13 |
| 1448194_a_at | H19               | H19 fetal liver mRNA                                                                     | 9.76  |
| 1420558_at   | Selp              | selectin, platelet                                                                       | 9.74  |
| 1422026_at   | Pi16              | peptidase inhibitor 16                                                                   | 9.72  |
| 1448395_at   | Sfrp1             | secreted frizzled-related protein 1                                                      | 9.68  |
| 1445546_at   | A1844685          | expressed sequence A1844685                                                              | 8.99  |
| 1454995_at   | Ddah1             | dimethylarginine dimethylaminohydrolase 1                                                | 8.86  |
| 1429178_at   | Odz3              | odd Oz/ten-m homolog 3 (Drosophila)                                                      | 8.52  |
| 1423349_at   | Socs5             | suppressor of cytokine signaling 5                                                       | 8.52  |
| 1421207_at   | Lif               | leukemia inhibitory factor                                                               | 8.42  |
| 1421217_a_at | Lgals9            | lectin, galactose binding, soluble 9                                                     | 8.34  |
| 1431004_at   | Loxl2             | lysyl oxidase-like 2                                                                     | 8.01  |
| 1415951_at   | Fkbp10            | FK506 binding protein 10                                                                 | 7.96  |
| 1458015_at   | Megf11            | multiple EGF-like-domains 11                                                             | 7.94  |
| 1460465_at   | A930038C0<br>7Rik | RIKEN cDNA A930038C07 gene                                                               | 7.84  |
| 1455607_at   | Rspo3             | R-spondin 3 homolog (Xenopus laevis)                                                     | 7.62  |
| 1456351_at   | Brd8              | bromodomain containing 8                                                                 | 7.38  |
| 1457117_at   | Nfe2l2            | nuclear factor, erythroid derived 2, like 2                                              | 7.36  |
| 1426865_a_at | Ncam1             | neural cell adhesion molecule 1                                                          | 7.29  |
| 1449249_at   | Pcdh7             | protocadherin 7                                                                          | 7.27  |
| 1440007_at   | D930003E1<br>8Rik | RIKEN cDNA D930003E18 gene                                                               | 7.27  |
| 1442115_at   | Fam38b            | family with sequence similarity 38, member B                                             | 7.23  |
| 1420664_s_at | Procr             | protein C receptor, endothelial                                                          | 7.20  |
| 1434382_at   | Serinc2           | serine incorporator 2                                                                    | 7.08  |
| 1423495_at   | Decr2             | 2-4-dienoyl-Coenzyme A reductase 2, peroxisomal                                          | 6.98  |

|              |                   |                                                                                             |      |
|--------------|-------------------|---------------------------------------------------------------------------------------------|------|
| 1424793_a_at | Pbp2              | phosphatidylethanolamine binding protein 2                                                  | 6.96 |
| 1419431_at   | Ereg              | epiregulin                                                                                  | 6.94 |
| 1452985_at   | Uaca              | uveal autoantigen with coiled-coil domains and ankyrin repeats                              | 6.83 |
| 1436003_at   | Vcam1             | vascular cell adhesion molecule 1                                                           | 6.81 |
| 1440739_at   | Vegfc             | vascular endothelial growth factor C                                                        | 6.77 |
| 1451416_a_at | Tgm1              | transglutaminase 1, K polypeptide                                                           | 6.65 |
| 1442590_at   | Tnfrsf22          | tumor necrosis factor receptor                                                              | 6.65 |
| 1419417_at   | Vegfc             | vascular endothelial growth factor C                                                        | 6.54 |
| 1453480_at   | Tmem213           | transmembrane protein 213                                                                   | 6.53 |
| 1448470_at   | Fbp1              | fructose biphosphatase 1                                                                    | 6.48 |
| 1424097_at   | Elov17            | ELOVL family member 7, elongation of long chain fatty acids (yeast)                         | 6.34 |
| 1418349_at   | Hbegf             | heparin-binding EGF-like growth factor                                                      | 6.15 |
| 1437218_at   | Fn1               | fibronectin 1                                                                               | 5.83 |
| 1426600_at   | Slc2a1            | solute carrier family 2 (facilitated glucose transporter), member 1                         | 5.80 |
| 1438620_x_at | Sfrp1             | secreted frizzled-related protein 1                                                         | 5.78 |
| 1428584_a_at | Haghl             | hydroxyacylglutathione hydrolase-like                                                       | 5.75 |
| 1417024_at   | Hars              | histidyl-tRNA synthetase                                                                    | 5.57 |
| 1439882_at   | Sec23ip           | Sec23 interacting protein                                                                   | 5.55 |
| 1452432_at   | Tfpi              | tissue factor pathway inhibitor                                                             | 5.46 |
| 1456748_a_at | Nipsnap1          | 4-nitrophenylphosphatase domain and non-neuronal SNAP25-like protein homolog 1 (C. elegans) | 5.46 |
| 1448894_at   | Akr1b8            | aldo-keto reductase family 1, member B8                                                     | 5.45 |
| 1434046_at   | AA467197          | expressed sequence AA467197                                                                 | 5.26 |
| 1426981_at   | Pcsk6             | proprotein convertase subtilisin/kexin type 6                                               | 5.17 |
| 1453470_a_at | Gna13             | guanine nucleotide binding protein, alpha 13                                                | 5.13 |
| 1429958_x_at | Haghl             | hydroxyacylglutathione hydrolase-like                                                       | 5.02 |
| 1449298_a_at | Pde1a             | phosphodiesterase 1A, calmodulin-dependent                                                  | 4.96 |
| 1460302_at   | Thbs1             | thrombospondin 1                                                                            | 4.95 |
| 1418025_at   | Bhlhe40           | basic helix-loop-helix family, member e40                                                   | 4.91 |
| 1448276_at   | Tspan4            | tetraspanin 4                                                                               | 4.71 |
| 1449305_at   | F10               | coagulation factor X                                                                        | 4.62 |
| 1456653_a_at | Mthfd1l           | methylenetetrahydrofolate dehydrogenase (NADP+ dependent) 1-like                            | 4.62 |
| 1450839_at   | D0H4S114          | DNA segment, human D4S114                                                                   | 4.61 |
| 1416342_at   | Tnc               | tenascin C                                                                                  | 4.60 |
| 1428630_x_at | Haghl             | hydroxyacylglutathione hydrolase-like                                                       | 4.59 |
| 1427357_at   | Cda               | cytidine deaminase                                                                          | 4.54 |
| 1450625_at   | Col5a2            | collagen, type V, alpha 2                                                                   | 4.52 |
| 1424086_at   | Oaf               | OAF homolog (Drosophila)                                                                    | 4.49 |
| 1436942_at   | A930035D0<br>4Rik | RIKEN cDNA A930035D04 gene                                                                  | 4.48 |
| 1440409_at   | Gcnt3             | glucosaminyl (N-acetyl) transferase 3, mucin type                                           | 4.45 |
| 1448754_at   | Rbp1              | retinol binding protein 1, cellular                                                         | 4.41 |
| 1442529_at   |                   |                                                                                             | 4.39 |
| 1436345_at   | 5730559C1<br>8Rik | RIKEN cDNA 5730559C18 gene                                                                  | 4.39 |
| 1447284_at   | Trem1             | triggering receptor expressed on myeloid cells 1                                            | 4.38 |
| 1448025_at   |                   |                                                                                             | 4.34 |



|              |                   |                                                          |      |
|--------------|-------------------|----------------------------------------------------------|------|
| 1417599_at   | Cd276             | CD276 antigen                                            | 4.34 |
| 1431094_at   | 1110006E1<br>4Rik | RIKEN cDNA 1110006E14 gene                               | 4.29 |
| 1434129_s_at | Lhfpl2            | lipoma HMGIC fusion partner-like 2                       | 4.25 |
| 1424613_at   | Gprc5b            | G protein-coupled receptor, family C, group 5, member B  | 4.25 |
| 1429974_at   | Tbx18             | T-box18                                                  | 4.21 |
| 1459886_at   |                   |                                                          | 4.18 |
| 1426501_a_at | Tifa              | TRAF-interacting protein with forkhead-associated domain | 4.17 |
| 1439493_at   | Zfp827            | zinc finger protein 827                                  | 4.12 |
| 1423693_at   | Cela1             | chymotrypsin-like elastase family, member 1              | 4.11 |
| 1439944_at   |                   |                                                          | 4.11 |
| 1431033_x_at | Agl               | amylo-1,6-glucosidase, 4-alpha-glucanotransferase        | 4.02 |
| 1417040_a_at | Bok               | BCL2-related ovarian killer protein                      | 4.01 |
| 1419647_a_at | Ier3              | immediate early response 3                               | 4.01 |
| 1437283_at   | Tnpo2             | transportin 2 (importin 3, karyopherin beta 2b)          | 3.99 |
| 1455587_at   | Fam167b           | family with sequence similarity 167, member B            | 3.97 |
| 1431032_at   | Agl               | amylo-1,6-glucosidase, 4-alpha-glucanotransferase        | 3.96 |
| 1448251_at   | 9030425E1<br>1Rik | RIKEN cDNA 9030425E11 gene                               | 3.95 |
| 1432331_a_at | Prrx2             | paired related homeobox 2                                | 3.93 |
| 1422789_at   | Aldh1a2           | aldehyde dehydrogenase family 1, subfamily A2            | 3.91 |
| 1431422_a_at | Dusp14            | dual specificity phosphatase 14                          | 3.89 |
| 1418941_at   | Pcdhb22           | protocadherin beta 22                                    | 3.81 |
| 1424400_a_at |                   |                                                          | 3.81 |
| 1435264_at   | Emilin2           | elastin microfibril interfacier 2                        | 3.77 |
| 1452183_a_at | Meg3              | maternally expressed 3                                   | 3.75 |
| 1418571_at   | Tnfrsf12a         | tumor necrosis factor receptor superfamily, member 12a   | 3.73 |
| 1424369_at   | Psmf1             | proteasome (prosome, macropain) inhibitor subunit 1      | 3.71 |
| 1449450_at   | Ptges             | prostaglandin E synthase                                 | 3.68 |
| 1436920_at   | Pcdh17            | protocadherin 17                                         | 3.65 |
| 1419609_at   | Ccr1              | chemokine (C-C motif) receptor 1                         | 3.65 |
| 1454847_at   | Lhfpl2            | lipoma HMGIC fusion partner-like 2                       | 3.64 |
| 1454822_x_at | Apcdd1            | adenomatosis polyposis coli down-regulated 1             | 3.64 |
| 1429088_at   | Lbh               | limb-bud and heart                                       | 3.63 |
| 1435435_at   | Cttnbp2           | cortactin binding protein 2                              | 3.62 |
| 1429843_at   | Grrp1             | glycine/arginine rich protein 1                          | 3.61 |
| 1417595_at   | Meox1             | mesenchyme homeobox 1                                    | 3.60 |
| 1419123_a_at | Pdgfc             | platelet-derived growth factor, C polypeptide            | 3.58 |
| 1452730_at   | Rps4y2            | ribosomal protein S4, Y-linked 2                         | 3.57 |
| 1416273_at   | Tnfaip2           | tumor necrosis factor, alpha-induced protein 2           | 3.57 |
| 1423171_at   | Gpr88             | G-protein coupled receptor 88                            | 3.56 |
| 1429240_at   | Stard4            | StAR-related lipid transfer (START) domain containing 4  | 3.55 |
| 1423503_at   | Jam3              | junction adhesion molecule 3                             | 3.55 |
| 1417343_at   | Fxyd6             | FXYP domain-containing ion transport regulator 6         | 3.53 |
| 1418283_at   | Cldn4             | claudin 4                                                | 3.52 |
| 1427884_at   | Col3a1            | collagen, type III, alpha 1                              | 3.37 |
| 1418626_a_at | Clu               | clusterin                                                | 3.30 |
| 1417439_at   | Cd248             | CD248 antigen, endosialin                                | 3.29 |
| 1428780_at   | Tha1              | threonine aldolase 1                                     | 3.26 |
| 1452521_a_at | Plaur             | plasminogen activator, urokinase receptor                | 3.26 |
| 1451332_at   | Zfp521            | zinc finger protein 521                                  | 3.24 |

|              |                    |                                                                                     |      |
|--------------|--------------------|-------------------------------------------------------------------------------------|------|
| 1416686_at   | Plod2              | procollagen lysine, 2-oxoglutarate 5-dioxygenase 2                                  | 3.24 |
| 1418572_x_at | Tnfrsf12a          | tumor necrosis factor receptor superfamily, member 12a                              | 3.23 |
| 1423992_at   | Gatad2a            | GATA zinc finger domain containing 2A                                               | 3.23 |
| 1423380_s_at | Nfatc4             | nuclear factor of activated T-cells, cytoplasmic, calcineurin-dependent 4           | 3.20 |
| 1439516_at   | 2610201A1<br>3Rik  | RIKEN cDNA 2610201A13 gene                                                          | 3.20 |
| 1449360_at   | Csf2rb2            | colony stimulating factor 2 receptor, beta 2, low-affinity (granulocyte-macrophage) | 3.16 |
| 1450976_at   | Ndrp1              | N-myc downstream regulated gene 1                                                   | 3.16 |
| 1447223_at   |                    |                                                                                     | 3.14 |
| 1440975_at   | Mxra7              | matrix-remodelling associated 7                                                     | 3.12 |
| 1434033_at   | Tle1               | transducin-like enhancer of split 1, homolog of Drosophila E(spl)                   | 3.11 |
| 1455090_at   | Angptl2            | angiopoietin-like 2                                                                 | 3.11 |
| 1455179_at   | Mpp7               | membrane protein, palmitoylated 7 (MAGUK p55 subfamily member 7)                    | 3.09 |
| 1423319_at   | Hhex               | hematopoietically expressed homeobox                                                | 3.08 |
| 1422125_at   | Htr2b              | 5-hydroxytryptamine (serotonin) receptor 2B                                         | 3.06 |
| 1417290_at   | Lrg1               | leucine-rich alpha-2-glycoprotein 1                                                 | 3.05 |
| 1426546_at   | Tesk2              | testis-specific kinase 2                                                            | 3.05 |
| 1421824_at   | Bace1              | beta-site APP cleaving enzyme 1                                                     | 3.04 |
| 1448568_a_at | Slc20a1            | solute carrier family 20, member 1                                                  | 3.04 |
| 1416474_at   | Igdcc4             | immunoglobulin superfamily, DCC subclass, member 4                                  | 3.04 |
| 1434211_at   | Sh3bgrl2           | SH3 domain binding glutamic acid-rich protein like 2                                | 3.02 |
| 1416531_at   | Gsto1              | glutathione S-transferase omega 1                                                   | 3.02 |
| 1419087_s_at | Sf3a1              | splicing factor 3a, subunit 1                                                       | 3.01 |
| 1423216_a_at | 2510049I19<br>Rik  | RIKEN cDNA 2510049I19 gene                                                          | 3.00 |
| 1435110_at   | Unc5b              | unc-5 homolog B (C. elegans)                                                        | 2.98 |
| 1416409_at   | Acox1              | acyl-Coenzyme A oxidase 1, palmitoyl                                                | 2.98 |
| 1418323_at   | Fem1b              | feminization 1 homolog b (C. elegans)                                               | 2.97 |
| 1455468_at   | Dpy19l3            | dpy-19-like 3 (C. elegans)                                                          | 2.96 |
| 1426875_s_at | Srxn1              | sulfiredoxin 1 homolog (S. cerevisiae)                                              | 2.96 |
| 1457042_at   | AI256396           | EST AI256396                                                                        | 2.96 |
| 1417688_at   | Fam20c             | family with sequence similarity 20, member C                                        | 2.96 |
| 1416687_at   | Plod2              | procollagen lysine, 2-oxoglutarate 5-dioxygenase 2                                  | 2.95 |
| 1448654_at   | Mtch2              | mitochondrial carrier homolog 2 (C. elegans)                                        | 2.88 |
| 1425764_a_at | Bcat2              | branched chain aminotransferase 2, mitochondrial                                    | 2.87 |
| 1424109_a_at | Glo1               | glyoxalase 1                                                                        | 2.86 |
| 1419534_at   | Olr1               | oxidized low density lipoprotein (lectin-like) receptor 1                           | 2.85 |
| 1425951_a_at | Clec4n             | C-type lectin domain family 4, member n                                             | 2.83 |
| 1438530_at   | Tfpi               | tissue factor pathway inhibitor                                                     | 2.82 |
| 1434413_at   | Igf1               | insulin-like growth factor 1                                                        | 2.80 |
| 1460466_at   | 1700047I17<br>Rik1 | RIKEN cDNA 1700047I17 gene 1                                                        | 2.80 |
| 1438097_at   | Rab20              | RAB20, member RAS oncogene family                                                   | 2.78 |
| 1442350_at   |                    |                                                                                     | 2.77 |
| 1436541_at   | 2310008H0<br>9Rik  | RIKEN cDNA 2310008H09 gene                                                          | 2.77 |
| 1433778_at   | Tnks               | tankyrase, TRF1-interacting ankyrin-related ADP-ribose polymerase                   | 2.76 |

|              |                   |                                                             |      |
|--------------|-------------------|-------------------------------------------------------------|------|
| 1448933_at   | Pcdhb17           | protocadherin beta 17                                       | 2.76 |
| 1425582_a_at | Emcn              | endomucin                                                   | 2.75 |
| 1421034_a_at | Il4ra             | interleukin 4 receptor, alpha                               | 2.75 |
| 1451127_at   | Vopp1             | vesicular, overexpressed in cancer, prosurvival protein 1   | 2.75 |
| 1425558_at   | Klc3              | kinesin light chain 3                                       | 2.74 |
| 1428902_at   | Chst11            | carbohydrate sulfotransferase 11                            | 2.74 |
| 1445758_at   |                   |                                                             | 2.74 |
| 1418456_a_at | Cxcl14            | chemokine (C-X-C motif) ligand 14                           | 2.74 |
| 1435385_at   | Tshz2             | teashirt zinc finger family member 2                        | 2.66 |
| 1449025_at   | lfit3             | interferon-induced protein with tetratricopeptide repeats 3 | 2.66 |
| 1429321_at   | Rnf149            | ring finger protein 149                                     | 2.64 |
| 1420352_at   | Prss22            | protease, serine, 22                                        | 2.63 |
| 1439747_at   | Ptges             | prostaglandin E synthase                                    | 2.59 |
| 1429395_at   | Gstcd             | glutathione S-transferase, C-terminal domain containing     | 2.59 |
| 1455112_at   | Aifm2             | apoptosis-inducing factor, mitochondrion-associated 2       | 2.58 |
| 1426388_s_at | Ryk               | receptor-like tyrosine kinase                               | 2.58 |
| 1449315_at   | Odz3              | odd Oz/ten-m homolog 3 (Drosophila)                         | 2.56 |
| 1436512_at   |                   |                                                             | 2.55 |
| 1423702_at   | H1f0              | H1 histone family, member 0                                 | 2.54 |
| 1417308_at   | Pkm2              | pyruvate kinase, muscle                                     | 2.53 |
| 1424186_at   | Ccdc80            | coiled-coil domain containing 80                            | 2.53 |
| 1415977_at   | Isyna1            | myo-inositol 1-phosphate synthase A1                        | 2.52 |
| 1436431_at   | 1700025G0<br>4Rik | RIKEN cDNA 1700025G04 gene                                  | 2.52 |
| 1456111_at   | Fam55d            | family with sequence similarity 55, member D                | 2.51 |
| 1443827_x_at | Fam20c            | family with sequence similarity 20, member C                | 2.51 |
| 1434889_at   | Plekha7           | pleckstrin homology domain containing, family A member 7    | 2.51 |
| 1426968_a_at | Rdh10             | retinol dehydrogenase 10 (all-trans)                        | 2.50 |
| 1454788_at   |                   |                                                             | 2.48 |
| 1418490_at   | Sdsl              | serine dehydratase-like                                     | 2.46 |
| 1416805_at   | 1110032E2<br>3Rik | RIKEN cDNA 1110032E23 gene                                  | 2.43 |
| 1416334_at   | Wwox              | WW domain-containing oxidoreductase                         | 2.42 |
| 1454667_at   | Snx8              | sorting nexin 8                                             | 2.41 |
| 1442434_at   | D8Ert82e          | DNA segment, Chr 8, ERATO Doi 82, expressed                 | 2.39 |
| 1453187_at   | Ociad2            | OCIA domain containing 2                                    | 2.36 |
| 1417129_a_at | Meis2             | Meis homeobox 2                                             | 2.36 |
| 1439786_at   | Gab2              | growth factor receptor                                      | 2.34 |
| 1428671_at   | 2200002D0<br>1Rik | RIKEN cDNA 2200002D01 gene                                  | 2.33 |
| 1417312_at   | Dkk3              | dickkopf homolog 3 (Xenopus laevis)                         | 2.32 |
| 1428120_at   | Fbxw9             | F-box and WD-40 domain protein 9                            | 2.30 |
| 1452997_at   | 6820431F20<br>Rik | RIKEN cDNA 6820431F20 gene                                  | 2.30 |
| 1429040_at   | 6820431F20<br>Rik | RIKEN cDNA 6820431F20 gene                                  | 2.30 |
| 1438214_at   | Trps1             | trichorhinophalangeal syndrome I (human)                    | 2.29 |
| 1417492_at   | Ctsb              | cathepsin B                                                 | 2.29 |
| 1425546_a_at | Trf               | transferrin                                                 | 2.27 |
| 1460205_at   | Dcakd             | dephospho-CoA kinase domain containing                      | 2.27 |
| 1417094_at   | Acot7             | acyl-CoA thioesterase 7                                     | 2.27 |

|              |               |                                                                             |      |
|--------------|---------------|-----------------------------------------------------------------------------|------|
| 1416473_a_at | Igdcc4        | immunoglobulin superfamily, DCC subclass, member 4                          | 2.27 |
| 1438815_at   | Hist2h2aa1    | histone cluster 2                                                           | 2.27 |
| 1418431_at   | Kif5b         | kinesin family member 5B                                                    | 2.26 |
| 1454765_at   | Gtf3c3        | general transcription factor IIIC, polypeptide 3                            | 2.25 |
| 1460726_at   |               | adenylosuccinate synthetase, non muscle                                     | 2.21 |
| 1450129_a_at | Socs6         | suppressor of cytokine signaling 6                                          | 2.21 |
| 1436895_at   | Arap2         | ArfGAP with RhoGAP domain, ankyrin repeat and PH domain 2                   | 2.20 |
| 1460677_at   | Spats2        | spermatogenesis associated, serine-rich 2                                   | 2.20 |
| 1420965_a_at | Enc1          | ectodermal-neural cortex 1                                                  | 2.19 |
| 1417092_at   | Pth1r         | parathyroid hormone 1 receptor                                              | 2.18 |
| 1424356_a_at | Metrn1        | meteorin, glial cell differentiation regulator-like                         | 2.18 |
| 1439615_at   | Gan           | giant axonal neuropathy                                                     | 2.18 |
| 1441891_x_at | Elovl7        | ELOVL family member 7, elongation of long chain fatty acids (yeast)         | 2.17 |
| 1418365_at   | Ctsh          | cathepsin H                                                                 | 2.17 |
| 1424839_a_at | Nsun4         | NOL1/NOP2/Sun domain family, member 4                                       | 2.17 |
| 1416378_at   | Pnkp          | polynucleotide kinase 3'-phosphatase                                        | 2.14 |
| 1437606_at   | 9530048O09Rik | RIKEN cDNA 9530048O09 gene                                                  | 2.13 |
| 1435679_at   | Optn          | optineurin                                                                  | 2.12 |
| 1427994_at   |               |                                                                             | 2.10 |
| 1421375_a_at | S100a6        | S100 calcium binding protein A6 (calcyclin)                                 | 2.10 |
| 1458683_at   | Sirpb1        | signal-regulatory protein beta 1                                            | 2.08 |
| 1444089_at   | Spnb2         | spectrin beta 2                                                             | 2.08 |
| 1426553_at   | Dnajc14       | DnaJ (Hsp40) homolog, subfamily C, member 14                                | 2.04 |
| 1441894_s_at | Grasp         | GRP1 (general receptor for phosphoinositides 1)-associated scaffold protein | 2.02 |
| 1423706_a_at | Pgd           | phosphogluconate dehydrogenase                                              | 2.02 |
| 1424478_at   | Bbs2          | Bardet-Biedl syndrome 2 (human)                                             | 2.01 |
| 1442118_at   |               |                                                                             | 1.99 |
| 1417201_at   | Nt5c2         | 5'-nucleotidase, cytosolic II                                               | 1.99 |
| 1424874_a_at | Ptbp1         | polypyrimidine tract binding protein 1                                      | 1.98 |
| 1448656_at   | Cacnb3        | calcium channel, voltage-dependent, beta 3 subunit                          | 1.98 |
| 1456952_at   |               |                                                                             | 1.98 |
| 1422650_a_at | Riok3         | RIO kinase 3 (yeast)                                                        | 1.98 |
| 1434754_at   | Garnl4        | GTPase activating RANGAP domain-like 4                                      | 1.97 |
| 1435549_at   | Trpm4         | transient receptor potential cation channel, subfamily M, member 4          | 1.96 |
| 1428391_at   | Rab3il1       | RAB3A interacting protein (rabin3)-like 1                                   | 1.95 |
| 1423960_at   | Lpcat3        | lysophosphatidylcholine acyltransferase 3                                   | 1.95 |
| 1448663_s_at | Mvd           | mevalonate (diphospho) decarboxylase                                        | 1.92 |
| 1435940_at   | Dclk1         | doublecortin-like kinase 1                                                  | 1.91 |
| 1456036_x_at | Gsto1         | glutathione S-transferase omega 1                                           | 1.89 |
| 1449311_at   | Bach1         | BTB and CNC homology 1                                                      | 1.89 |
| 1451036_at   | Spg21         | spastic paraplegia 21 homolog (human)                                       | 1.88 |
| 1431856_a_at | C1qtnf6       | C1q and tumor necrosis factor related protein 6                             | 1.88 |
| 1433575_at   | Sox4          | SRY-box containing gene 4                                                   | 1.84 |
| 1455978_a_at | Matn2         | matriilin 2                                                                 | 1.82 |
| 1422842_at   | Xrn2          | 5'-3' exoribonuclease 2                                                     | 1.81 |
| 1433548_at   | Mare          | alpha globin regulatory element containing gene                             | 1.80 |

|              |                   |                                                                  |      |
|--------------|-------------------|------------------------------------------------------------------|------|
| 1422878_at   | Syt12             | synaptotagmin XII                                                | 1.80 |
| 1416995_at   | Pacsin3           | protein kinase C and casein kinase substrate in neurons 3        | 1.79 |
| 1455545_at   | 1110065P2<br>ORik | RIKEN cDNA 1110065P20 gene                                       | 1.77 |
| 1425528_at   | Prrx1             | paired related homeobox 1                                        | 1.76 |
| 1425045_at   | Jmjd7             | jumonji domain containing 7                                      | 1.74 |
| 1434206_s_at | Ppp2r5c           | protein phosphatase 2, regulatory subunit B (B56), gamma isoform | 1.73 |
| 1436747_at   | Fam100b           | family with sequence similarity 100, member B                    | 1.71 |
| 1422507_at   | Cstb              | cystatin B                                                       | 1.70 |
| 1424214_at   | 9130213B0<br>5Rik | RIKEN cDNA 9130213B05 gene                                       | 1.70 |
| 1435571_at   | Mpzi3             | myelin protein zero-like 3                                       | 1.68 |
| 1417147_at   | Fam69b            | family with sequence similarity 69, member B                     | 1.68 |
| 1417501_at   | Fbxo6             | F-box protein 6                                                  | 1.66 |
| 1424271_at   | Dclk1             | doublecortin-like kinase 1                                       | 1.65 |
| 1417700_at   | Rab38             | RAB38, member of RAS oncogene family                             | 1.64 |
| 1417902_at   | Slc19a2           | solute carrier family 19 (thiamine transporter), member 2        | 1.63 |
| 1436120_at   | Setdb2            | SET domain, bifurcated 2                                         | 1.63 |
| 1429110_a_at | Nsun4             | NOL1/NOP2/Sun domain family, member 4                            | 1.61 |
| 1415988_at   | Hdlbp             | high density lipoprotein (HDL) binding protein                   | 1.61 |
| 1422508_at   | Atp6v1a           | ATPase, H <sup>+</sup> transporting, lysosomal V1 subunit A      | 1.59 |
| 1422549_at   | Arl2              | ADP-ribosylation factor-like 2                                   | 1.53 |
| 1426567_a_at | Pqlc1             | PQ loop repeat containing 1                                      | 1.52 |
| 1438407_at   | Dsel              | dermatan sulfate epimerase-like                                  | 1.47 |
| 1441940_x_at | Klhdc8a           | kelch domain containing 8A                                       | 1.43 |
| 1451791_at   | Tfpi              | tissue factor pathway inhibitor                                  | 1.43 |

Genes DOWN in *KrasTgfr2<sup>-/-</sup>* STROMA, sorted by Fold-change(all P<.01,FDR<25%)

| Probe set    | Gene symbol   | Description                                                                | Fold-change |
|--------------|---------------|----------------------------------------------------------------------------|-------------|
| 1434171_at   | Zfp874        | zinc finger protein 874                                                    | 0.014       |
| 1431213_a_at | Gm3579        |                                                                            | 0.000       |
| 1455869_at   |               |                                                                            | 0.000       |
| 1444092_at   | 9430025M13Rik | RIKEN cDNA 9430025M13 gene                                                 | 0.032       |
| 1437128_a_at | A630033E08Rik | RIKEN cDNA A630033E08 gene                                                 | 0.008       |
| 1457945_at   |               |                                                                            | 0.015       |
| 1440339_at   | Enpp1         | ectonucleotide pyrophosphatase/phosphodiesterase 1                         | 0.008       |
| 1435514_at   | Lztlf1        | leucine zipper transcription factor-like 1                                 | 0.036       |
| 1440188_at   |               |                                                                            | 0.037       |
| 1435682_at   | Lars2         | leucyl-tRNA synthetase, mitochondrial                                      | 0.152       |
| 1435491_at   | 9830167H18Rik | RIKEN cDNA 9830167H18 gene                                                 | 0.337       |
| 1417360_at   | Mlh1          | mutL homolog 1 (E. coli)                                                   | 0.226       |
| 1426417_at   | Yipf4         | Yip1 domain family, member 4                                               | 0.117       |
| 1446471_at   |               |                                                                            | 0.023       |
| 1439475_at   | Zfp429        | zinc finger protein 429                                                    | 0.011       |
| 1455219_at   | 1110030E23Rik | RIKEN cDNA 1110030E23 gene                                                 | 0.369       |
| 1446750_at   | Impact        | imprinted and ancient                                                      | 0.174       |
| 1440464_at   | Elavl1        | ELAV (embryonic lethal, abnormal vision, Drosophila)-like 1 (Hu antigen R) | 0.244       |
| 1440471_x_at |               |                                                                            | 0.354       |
| 1458607_at   |               |                                                                            | 0.272       |
| 1434962_x_at | Ccl27a        | chemokine (C-C motif) ligand 27A                                           | 0.057       |
| 1456655_at   |               |                                                                            | 0.032       |
| 1437221_at   | Rrm2b         | ribonucleotide reductase M2 B (TP53 inducible)                             | 0.246       |
| 1458318_at   |               |                                                                            | 0.199       |
| 1454402_at   | 3110048L19Rik | zinc finger pseudogene                                                     | 0.034       |
| 1438238_at   | 2010315B03Rik | RIKEN cDNA 2010315B03 gene                                                 | 0.244       |
| 1460628_at   | Eme2          | essential meiotic endonuclease 1 homolog 2 (S. pombe)                      | 0.085       |
| 1449337_at   | Tdo2          | tryptophan 2,3-dioxygenase                                                 | 0.282       |
| 1434441_at   | 1110018J18Rik | RIKEN cDNA 1110018J18 gene                                                 | 0.330       |
| 1418429_at   | Kif5b         | kinesin family member 5B                                                   | 0.039       |
| 1457163_at   | D730035F11Rik | RIKEN cDNA D730035F11 gene                                                 | 0.082       |
| 1456331_at   | 9130023H24Rik | RIKEN cDNA 9130023H24 gene                                                 | 0.301       |
| 1422011_s_at |               |                                                                            | 0.438       |
| 1456663_x_at | Tm2d2         | TM2 domain containing 2                                                    | 0.393       |
| 1436337_at   | 4930420K17Rik | RIKEN cDNA 4930420K17 gene                                                 | 0.372       |
| 1426472_at   | Zfp52         | zinc finger protein 52                                                     | 0.196       |
| 1417470_at   | Apobec3       | apolipoprotein B mRNA editing enzyme, catalytic polypeptide 3              | 0.139       |
| 1426218_at   | Glcci1        | glucocorticoid induced transcript 1                                        | 0.351       |
| 1452508_x_at | Ptms          | parathymosin                                                               | 0.414       |
| 1460670_at   | Riok3         | RIO kinase 3 (yeast)                                                       | 0.211       |
| 1428920_at   | Hmg20a        | high mobility group 20A                                                    | 0.695       |
| 1434333_a_at | Prkd2         | protein kinase D2                                                          | 0.659       |
| 1452565_x_at | LOC641050     | hypothetical protein LOC641050                                             | 0.184       |
| 1429925_at   | Clec12b       | C-type lectin domain family 12, member B                                   | 0.289       |

|              |               |                                                                                     |       |
|--------------|---------------|-------------------------------------------------------------------------------------|-------|
| 1432161_a_at | Ptar1         | protein prenyltransferase alpha subunit repeat containing 1                         | 0.292 |
| 1420661_a_at | 4933439F18Rik | RIKEN cDNA 4933439F18 gene                                                          | 0.421 |
| 1433913_at   | C80913        | expressed sequence C80913                                                           | 0.213 |
| 1435660_at   | LOC664787     | similar to Sp110 nuclear body protein                                               | 0.193 |
| 1435909_at   | C030034I22Rik | RIKEN cDNA C030034I22 gene                                                          | 0.341 |
| 1455973_at   | Gm11992       | predicted gene 11992                                                                | 0.329 |
| 1457233_at   | Dnaja2        | DnaJ (Hsp40) homolog, subfamily A, member 2                                         | 0.443 |
| 1439376_x_at | Dmtf1         | cyclin D binding myb-like transcription factor 1                                    | 0.034 |
| 1443640_at   | Zfp617        | zinc finger protein 617                                                             | 0.211 |
| 1436294_at   | Ankrd29       | ankyrin repeat domain 29                                                            | 0.334 |
| 1452272_a_at | Gfer          | growth factor, erv1 ( <i>S. cerevisiae</i> )-like (augmenter of liver regeneration) | 0.306 |
| 1426471_at   | Zfp52         | zinc finger protein 52                                                              | 0.289 |
| 1437516_at   |               |                                                                                     | 0.458 |
| 1453571_at   | Depdc6        | DEP domain containing 6                                                             | 0.211 |
| 1453824_at   | Ccdc76        | coiled-coil domain containing 76                                                    | 0.518 |
| 1451191_at   | Crabp2        | cellular retinoic acid binding protein II                                           | 0.131 |
| 1444031_at   | Camk2d        | calcium/calmodulin-dependent protein kinase II, delta                               | 0.149 |
| 1421854_at   | Fgl2          | fibrinogen-like protein 2                                                           | 0.468 |
| 1442153_at   |               |                                                                                     | 0.305 |
| 1445884_at   |               |                                                                                     | 0.337 |
| 1440114_x_at | Kank3         | KN motif and ankyrin repeat domains 3                                               | 0.486 |
| 1437614_x_at | Zdhhc14       | zinc finger, DHHC domain containing 14                                              | 0.208 |
| 1434554_at   | Trim37        | tripartite motif-containing 37                                                      | 0.774 |
| 1452535_at   | Igh-6         | immunoglobulin heavy chain 6 (heavy chain of IgM)                                   | 0.074 |
| 1441073_at   | NA            | NA                                                                                  | 0.271 |
| 1441910_x_at | Ccne1         | cyclin E1                                                                           | 0.359 |
| 1442411_at   |               |                                                                                     | 0.250 |
| 1417283_at   | Lynx1         | Ly6/neurotoxin 1                                                                    | 0.294 |
| 1438975_x_at | Zdhhc14       | zinc finger, DHHC domain containing 14                                              | 0.221 |
| 1437222_x_at | Rrm2b         | ribonucleotide reductase M2 B (TP53 inducible)                                      | 0.261 |
| 1440927_x_at | Apol11b       | apolipoprotein L 11b                                                                | 0.174 |
| 1421358_at   | H2-M3         | histocompatibility 2, M region locus 3                                              | 0.260 |
| 1422730_at   | Limd1         | LIM domains containing 1                                                            | 0.328 |
| 1451456_at   | Hjrup         | Holliday junction recognition protein                                               | 0.291 |
| 1417619_at   | Gadd45gip1    | growth arrest and DNA-damage-inducible, gamma interacting protein 1                 | 0.392 |
| 1442897_at   | Fam13b        | family with sequence similarity 13, member B                                        | 0.469 |
| 1444845_at   | Scfd1         | Sec1 family domain containing 1                                                     | 0.284 |
| 1424824_at   | Slain1        | SLAIN motif family, member 1                                                        | 0.457 |
| 1435872_at   |               |                                                                                     | 0.246 |
| 1447946_at   | Adam23        | a disintegrin and metallopeptidase domain 23                                        | 0.183 |
| 1424324_at   | Esco1         | establishment of cohesion 1 homolog 1 ( <i>S. cerevisiae</i> )                      | 0.401 |
| 1419188_s_at | Ccl27a        | chemokine (C-C motif) ligand 27A                                                    | 0.202 |
| 1438258_at   | Vldlr         | very low density lipoprotein receptor                                               | 0.406 |
| 1420693_at   | Myom1         | myomesin 1                                                                          | 0.309 |
| 1445349_at   |               |                                                                                     | 0.594 |
| 1435293_at   | Adam22        | a disintegrin and metallopeptidase domain 22                                        | 0.368 |
| 1434145_s_at | Serhl         | serine hydrolase-like                                                               | 0.193 |
| 1445201_at   | Zfp53         | zinc finger protein 53                                                              | 0.765 |

|              |               |                                                                             |       |
|--------------|---------------|-----------------------------------------------------------------------------|-------|
| 1438037_at   | Herc5         | hect domain and RLD 5                                                       | 0.669 |
| 1437911_at   | 6330416L07Rik | RIKEN cDNA 6330416L07 gene                                                  | 0.393 |
| 1438641_x_at | Fam57b        | family with sequence similarity 57, member B                                | 0.415 |
| 1441305_at   | Nedd4l        | neural precursor cell expressed, developmentally down-regulated gene 4-like | 0.678 |
| 1441111_at   |               |                                                                             | 0.039 |
| 1438031_at   | Rasgrp3       | RAS, guanyl releasing protein 3                                             | 0.253 |
| 1441747_at   |               |                                                                             | 0.384 |
| 1436621_at   | RP23-157O10.7 | P140 gene                                                                   | 0.766 |
| 1453752_at   | Rpl17         | ribosomal protein L17                                                       | 0.087 |
| 1435521_at   | Msi2          | Musashi homolog 2 (Drosophila)                                              | 0.467 |
| 1424336_at   | Ppcdc         | phosphopantothenoylecysteine decarboxylase                                  | 0.104 |
| 1457386_at   |               |                                                                             | 0.305 |
| 1427306_at   | Ryr1          | ryanodine receptor 1, skeletal muscle                                       | 0.121 |
| 1444260_at   |               |                                                                             | 0.218 |
| 1435520_at   | Msi2          | Musashi homolog 2 (Drosophila)                                              | 0.503 |
| 1458455_at   | Abra          | actin-binding Rho activating protein                                        | 0.132 |
| 1421230_a_at | Msi2          | Musashi homolog 2 (Drosophila)                                              | 0.417 |
| 1451972_at   |               |                                                                             | 0.261 |
| 1434326_x_at | Coro2b        | coronin, actin binding protein, 2B                                          | 0.264 |
| 1425584_x_at |               |                                                                             | 0.371 |
| 1438931_s_at |               |                                                                             | 0.706 |
| 1439173_at   | Hook1         | hook homolog 1 (Drosophila)                                                 | 0.278 |
| 1426371_at   | Far1          | fatty acyl CoA reductase 1                                                  | 0.638 |
| 1421931_at   | Icos          | inducible T-cell co-stimulator                                              | 0.180 |
| 1418642_at   | Lcp2          | lymphocyte cytosolic protein 2                                              | 0.280 |
| 1425012_at   | Gng5          | guanine nucleotide binding protein (G protein), gamma 5                     | 0.311 |
| 1429466_s_at |               |                                                                             | 0.376 |
| 1425469_a_at |               |                                                                             | 0.490 |
| 1417141_at   | Igtp          | interferon gamma induced GTPase                                             | 0.575 |
| 1451629_at   | Lbh           | limb-bud and heart                                                          | 0.397 |
| 1428974_s_at | Lztf1         | leucine zipper transcription factor-like 1                                  | 0.383 |
| 1439361_at   |               |                                                                             | 0.448 |
| 1423180_at   | Kcnb1         | potassium voltage gated channel, Shab-related subfamily, member 1           | 0.436 |
| 1428026_at   | Tshz2         | teashirt zinc finger family member 2                                        | 0.403 |



**Supplemental Table 5. Immune Response and Development Pathway Genes Differentially Expressed in Stroma of *KrasTbr2<sup>-/-</sup>* vs. *KrasTbr2<sup>wt</sup>* Murine Lung Tumors.**

**Development Genes**

**Embryonic development**

**Gatad2a**  
**Gna13**  
**Gtf2ird1**  
**Hhex**  
**Htr2b**  
**Meg3**  
**Nfe2l2**  
**Rdh10**  
**Wnt7a**

**Morphogenesis of embryonic epithelium**

**Aldh1a2**  
**Crabp2**  
**Fem1b**  
**Hhex**  
**Tbx18**  
**Vegfc**

**Organ morphogenesis**

**Ereg**  
**Frzb**  
**Hhex**  
**Rdh10**  
**Vegfc**  
**Wnt7a**

**Lung development**

**Aldh1a2**  
**Ctsh**  
**Hhex**  
**Igf1**  
**Meg3**  
**Rdh10**  
**Tnc**

**Somitogenesis/Skeletal muscle devel.**

**Aldh1a2**  
**Chst11**

**Brain/Nervous sytem development**

**Aldh1a2**  
**Dclk1**  
**Enc1**  
**Hhex**  
**Htr2b**  
**Igf1**  
**Meis2**  
**Rdh10**  
**Unc5b**  
**Wnt7a**

**Digestive/Pancreas development**

**Aldh1a2**  
**Cela1**  
**Hhex**  
**Igf1**  
**Meis2**  
**Sfrp1**  
**Sox4**

**Gonad development**

**Ereg**  
**Rdh10**  
**Sfrp1**  
**Wnt7a**

**Heart development**

**Aldh1a2**  
**Hhex**  
**Htr2b**  
**Nfatc4**  
**Sox4**  
**Vcam1**

**Prostate development**

**Fem1b**  
**Igf1**  
**Sfrp1**

**Crabp2**

**Frzb**

**Prrx1**

**Prrx2**

**Pth1r**

**Rdh10**

**Sfrp1**

**Tbx18**

**Wnt7a**

**Wwox**

**Tnc**

**Misc organ development**

**Areg (breast)**

**Dkk3(adrenal)**

**Igf1 (breast)**

Red- Genes upregulated in *KrasTgfr2*<sup>-/-</sup> vs. *KrasTgfr2*<sup>WT</sup>  
Green- Genes downregulated in *KrasTgfr2*<sup>-/-</sup> vs. *KrasTgfr2*<sup>WT</sup>

## Immune Response Genes

### Immune response

1427994\_at

Adss

Ccr1

Cd276

Clec4E

Clec4n

Cx3cl1

Cxcl14

Cxcl2

Cxcl3

Enpp2

Ereg

H60a

Herc5 (innate)

Icos

Il4ra

Lcp2

Lif

NM\_007686

Procr

Ptms

Trpm4

### Inflammatory response

Cd276

Cela1

Cx3cl1

Cxcl2

Cxcl3

Nfatc4

Olr1

Selp

Spp1

Thbs1

### Leukocyte chemotaxis

Ccr1

Cd177

Cx3cl1

Cxcl3

S100a14

### Cellular response to IL4

Arg1

Ctsb

### Regulation/Cellular response to TGF-B

Arg1

Cx3cl1

Sfrp1

Wnt7a

### Positive and negative T cell regulation

Cd276

Kng1

Vcam1

### T cell signaling

Cacnb3

Icos

### T cell differentiation

Sox4

### T cell cytotoxicity

H2-M3

### Negative regulation Th1, Positive regulation Th2

Il4ra

### Positive regulation Th1, negative regulation Th2

Socs5

### Increased in activated T cells

Nfatc4

### Induction of IL2/IL4

Nfatc4

### Negative regulation of IL2

Cd276

**Selp**  
**Trem1**

**NK cell cytotoxicity**  
**H2-M3**  
**H60a**

Red- Genes upregulated in *KrasTgfr2*<sup>-/-</sup> vs. *KrasTgfr2*<sup>WT</sup>  
Green- Genes downregulated in *KrasTgfr2*<sup>-/-</sup> vs. *KrasTgfr2*<sup>WT</sup>

**Supplemental Table 6. Mouse Model Gene Sets used in GSEA validation of *KrasTgfr2*<sup>-/-</sup> model.**

| <b>Tgfr2_UP</b> | <b>mKrasLAT1_UP</b> | <b>Lkb1_UP</b> | <b>P53_UP</b> | <b>HIF2a_UP</b> |
|-----------------|---------------------|----------------|---------------|-----------------|
| ABCB1B          | AASS                | AASS           | AAK1          | AAK1            |
| ADAM12          | ACADL               | ACAD9          | ABCA1         | ABI3            |
| ADAMTS12        | ACE2                | ACADVL         | ABCB1B        | ACAS2L          |
| ADAMTS4         | ACLY                | ACAT1          | ABCB6         | ACIN1           |
| ADAT2           | ACSL4               | ACE2           | ABCF3         | ADAMTS8         |
| AFM             | ACSL5               | ACYP1          | ABHD1         | ADAMTSL2        |
| AFP             | ACTN1               | ADCY3          | ABR           | ADH1            |
| AHNAK2          | ACTN4               | ADI1           | ACE           | AGA             |
| AK3L1           | ADAM19              | AFP            | ACNAT2        | AIF1            |
| AKR1B8          | ADCY7               | AGRN           | ACO1          | AMY2            |
| ALDH1A2         | ADIPOR2             | AI413582       | ACP2          | ANXA6           |
| ALPK2           | ADSSL1              | AI506816       | ACSF2         | APLP1           |
| ANK             | AES                 | AKR1C12        | ACSS2         | APOBEC1         |
| ANKRD1          | AI506816            | AKR1C13        | ADAMTSL5      | ARID5B          |
| ANO1            | AI596198            | AKR1E1         | ADAP2         | ART3            |
| ANXA10          | AK1                 | AKR7A5         | ADARB1        | ASPN            |
| APLNR           | ALDOA               | ALB            | ADIPOR1       | ATP6V0E         |
| AREG            | ALDOC               | ALDH1A7        | ADRB2         | AW112010        |
| ARG1            | ANK3                | AMHR2          | ADRM1         | BC026657        |
| ARRDC3          | ANXA4               | ANXA5          | AGAP1         | BHC80           |
| ATG9B           | APEX1               | ANXA6          | AGAP3         | C1QA            |
| B830012L14RIK   | APOC1               | AP4S1          | AGFG2         | C1QB            |
| BAG2            | APRT                | APOBEC1        | AHCYL2        | C1QTNF5         |
| BC016579        | ARCN1               | APOBEC3        | AHR           | C1QTNF7         |
| BCL2L15         | AREG                | APOC1          | AI506816      | CARD4           |
| BEX1            | ARF6                | ARIH2          | AKR1A4        | CAV3            |
| BRUNOL5         | ARG1                | ARL1           | AKR1D1        | CCL19           |
| C130090K23RIK   | ARG2                | ARPC5          | ALDH18A1      | CD52            |
| CAR9            | ARGLU1              | ASNS           | ALDH2         | CD83            |
| CCDC117         | ARL8B               | ATP5J2         | ALK           | CD86            |
| CDA             | ATOX1               | ATP6V0E2       | AMBP          | CDC27           |
| CDKN2B          | ATP11A              | ATP6V1E1       | ANAPC2        | CDH11           |
| CEACAM1         | ATP1A1              | ATXN10         | ANG2          | CFH             |
| CHL1            | ATP1B1              | AURKAIP1       | ANKZF1        | CFH             |
| CLDN4           | ATP5C1              | AUTS2          | ANXA7         | CFH             |
| CLEC4D          | ATP5F1              | AW209491       | AP1G2         | CILP            |
| CLIP4           | ATP6V0A1            | B230118H07RIK  | APBB2         | CKLFSF3         |
| CLU             | ATP6V0C             | BCKDHA         | APH1A         | CLCA3           |

|          |               |         |               |           |
|----------|---------------|---------|---------------|-----------|
| COL12A1  | ATP6V0D1      | BCL2L14 | ARF3          | COL14A1   |
| COL15A1  | ATP6V1C1      | BCL2L15 | ARF6          | COL2A1    |
| COL7A1   | ATXN10        | BCL3    | ARFGAP1       | COLEC12   |
| COL8A1   | AU021092      | BET1    | ARFGAP2       | COMP      |
| CXCL3    | AVPI1         | BET1L   | ARGLU1        | CPXM1     |
| CXCL5    | AXIN1         | BNIP1   | ARHGEF18      | CPXM2     |
| DIO2     | AXL           | C80913  | ARHGEF2       | CREB3L3   |
| DKK2     | AZIN1         | CADPS2  | ARHGEF7       | CRHR2     |
| DLK1     | B3GAT3        | CAMK1   | ARID1A        | CSRP3     |
| EG433182 | B4GALNT1      | CAP1    | ARNT          | CX3CR1    |
| EGLN3    | BASP1         | CAR4    | ARRB2         | CXCL10    |
| EMILIN2  | BCL2A1A       | CAR8    | ARRDC4        | CXCL13    |
| ENO1     | BCL2A1A       | CAST    | ASAP1         | CXCL3     |
| EPHA3    | BEX1          | CBR1    | ASH1L         | CYGB      |
| EPHA4    | BEX4          | CBR3    | ATOH7         | DAAM1     |
| EREG     | BHLHE40       | CBX6    | ATP13A2       | DEPDC6    |
| FBLN2    | BMP4          | CCT5    | ATP2A1        | DSCAM     |
| FBP1     | BOP1          | CCT7    | ATP2B2        | DXBAY18   |
| FBP2     | BRAF          | CD177   | ATXN10        | EBF2      |
| FGFBP1   | BRD7          | CD53    | AXL           | ETOH11    |
| FGL1     | BSG           | CD97    | B230208H17RIK | ETV1      |
| FMOD     | BST1          | CDH16   | B3GNT9        | EXT1      |
| FRZB     | BTG1          | CES3    | B3GNTL1       | FCGR2B    |
| FST      | BTG3          | CHCHD4  | BACE1         | FCRL3     |
| FXYD4    | BXDC2         | CHCHD6  | BACE2         | FGD5      |
| FXYD6    | C1QB          | CHDH    | BAP1          | FGL2      |
| GCNT3    | C1QC          | CHI3L1  | BAT1A         | GAL       |
| GJA1     | C330027C09RIK | CIAO1   | BAZ2A         | GPR124    |
| GJA3     | C77080        | CIITA   | BC002230      | GPR65     |
| GJB4     | CAMSAP1       | CLASP2  | BC017647      | GRIT      |
| GPC1     | CAPZA3        | CLPB    | BC025446      | HDH       |
| GPC6     | CAR8          | CNBP    | BCL2L11       | HEYL      |
| GSTO1    | CASK          | CNPY2   | BCL2L15       | HIST1H2BC |
| GZME     | CCL6          | COL1A1  | BMP8B         | HPS4      |
| H19      | CCL9          | COL1A2  | BRD4          | ICA1      |
| HARS     | CCND1         | COL5A1  | BRDT          | IFI205    |
| HECW1    | CCR5          | COL5A2  | BSDC1         | IGF1      |
| HSD17B14 | CCT3          | COPS7A  | BTC           | IL10RA    |
| HSPA1A   | CD14          | COX5B   | C030018P15RIK | IL18BP    |
| HSPA1B   | CD44          | CPSF3   | C130036L24RIK | IL1B      |
| HSPB8    | CD63          | CRELD1  | C130090K23RIK | IL2RG     |
| HTRA3    | CD68          | CRYBG3  | C80068        | ITCH      |
| HTRA4    | CD74          | CTH     | CABC1         | ITGA1     |

|              |         |             |             |         |
|--------------|---------|-------------|-------------|---------|
| IGF1         | CD9     | CUBN        | CABP7       | ITGB5   |
| IGFBP3       | CDK2AP2 | CUEDC1      | CACHD1      | ITM2C   |
| IL33         | CDKN1A  | CUL7        | CACNA1A     | JAM3    |
| IL6          | CEACAM1 | D10WSU52E   | CAMK1D      | KCNMB2  |
| INHBA        | CEBPA   | D17H6S56E-5 | CAP1        | KCTD12  |
| ITGA7        | CFB     | D17WSU104E  | CAR10       | KHDRBS3 |
| ITGA9        | CH25H   | DDAH2       | CBLN1       | KLK11   |
| KLHDC8A      | CHCHD7  | DDC         | CC2D1A      | LEO1    |
| KLK1B9       | CHD4    | DDIT4L      | CCDC45      | LRRC25  |
| KNG1         | CHI3L1  | DFNA5       | CCDC64      | LY86    |
| KRT18        | CHI3L3  | DHRS4       | CCDC71      | LY96    |
| KRT19        | CHIA    | DMXL1       | CD4         | MAMDC2  |
| KRT7         | CHL1    | DNAJA1      | CDC2L1      | MAN2A1  |
| LAD1         | CHRNB1  | DNAJA4      | CDC73       | MAN2A1  |
| LIF          | CISD1   | DPP4        | CDCA4       | MATN2   |
| LMO7         | CITED2  | DPP7        | CDKN2A      | MB      |
| LOC100045283 | CKMT1   | DST         | CEACAM10    | MCTS1   |
| MALT1        | CKS2    | DSTYK       | CER1        | MDK     |
| MBOAT1       | CLCN5   | EAR1        | CHST15      | MFAP5   |
| MEG3         | CLDN3   | ECHDC2      | CITED4      | MMP3    |
| MEGF10       | CLDN7   | EHD4        | CLDN23      | MRPL55  |
| MEGF11       | CLDND1  | EIF4B       | CML3        | MS4A4B  |
| MFSD2        | CLIC1   | ELF5        | CNPY2       | MS4A4D  |
| MID1         | CLIP4   | ELK3        | COL4A1      | MS4A6B  |
| MIRG         | CLU     | EPDR1       | COL5A1      |         |
| MIXL1        | CLU     | ERAF        | COX18       |         |
| MMP11        | CNDP2   | ERDR1       | CPLX4       |         |
| MORC1        | CNIH2   | ETFB        | CPSF1       |         |
| MOXD1        | COL15A1 | FAHD1       | CRAMP1L     |         |
| MPZL2        | COL18A1 | FAM125A     | CUEDC2      |         |
| MPZL3        | COTL1   | FAM132A     | CXADR       |         |
| MSLN         | CPOX    | FAM20B      | CYGB        |         |
| MT1          | CRB3    | FBLN2       | CYP2C38     |         |
| MT2          | CRLF1   | FCRLS       | CYP3A44     |         |
| MTAP         | CRYGD   | FGF1        | D10ERTD641E |         |
| MYBPC2       | CSF2    | FKBP11      | D2ERTD63E   |         |
| NA           | CSF2RB2 | FKBP4       | D4ERTD117E  |         |
| NDRG4        | CSRP2   | FMC1        | DCAF8       |         |
| NPTX1        | CSTB    | FNBP1       | DCK         |         |
| NTS          | CTAGE5  | FRYL        | DCX         |         |
| PBP2         | CTNND2  | FUBP1       | DFFA        |         |
| PCDH21       | CTSA    | FURIN       | DFFB        |         |
| PFKL         | CTSB    | GABARAPL1   | DHCR24      |         |

|          |            |            |               |
|----------|------------|------------|---------------|
| PI16     | CTSC       | GADD45GIP1 | DLL4          |
| PKHD1    | CTSD       | GALC       | DLX1AS        |
| PKM2     | CTSH       | GALK2      | DLX6          |
| PRG4     | CTSK       | GARS       | DNAJB3        |
| PRKCDBP  | CTSS       | GDF15      | DNMT3A        |
| PROCR    | CTSZ       | GDPD3      | DOPEY2        |
| PROZ     | CXCL1      | GFER       | DPYS          |
| PRSS22   | CYB5R1     | GIT2       | DQX1          |
| PRSS35   | CYB5R3     | GJB3       | DSCAML1       |
| PSCA     | CYBA       | GLCCI1     | DSP           |
| PTGES    | CYHR1      | GNB1       | DUSP10        |
| PTHLH    | CYTSB      | GNE        | DUSP12        |
| PTPRN    | D15ERTD50E | GOT2       | DVL3          |
| RADIL    | D17WSU104E | GPBP1      | E330009J07RIK |
| RET      | DAP        | GPT2       | EGLN3         |
| RGS5     | DLK1       | GRB2       | EIF5          |
| RIAN     | DSC2       | GRCC10     | EML5          |
| RIN1     | DSCAML1    | GSTA3      | EPB4.1L1      |
| S100A14  | DUSP6      | GSTK1      | EPC1          |
| S100A6   | EAR1       | GSTM1      | EPS15L1       |
| SCARA3   | EAR2       | GSTM2      | ERDR1         |
| SCEL     | EDEM1      | GSTM4      | ERI3          |
| SDCBP2   | EEF1B2     | GSTT1      | ERMAP         |
| SELP     | EEF1D      | GTF2H4     | ERN2          |
| SEMA3B   | EEF2       | H13        | ESPN          |
| SERPINB2 | EG622147   | H2-AA      | ESRP2         |
| SEZ6L2   | EHD1       | H2-EB1     | ESYT3         |
| SFRP1    | EHMT2      | H2-Q7      | ETL4          |
| SLC19A2  | EIF1AY     | HAUS2      | FAM122A       |
| SLC20A1  | EIF2AK4    | HCFC1      | FAM160B1      |
| SLC23A3  | EIF3E      | HDC        | FAM178A       |
| SLC26A4  | EIF4B      | HDHD2      | FAM189B       |
| SLC2A1   | EIF4G1     | HHEX       | FAM60A        |
| SLC6A14  | ELF5       | HIBADH     | FAM83H        |
| SLCO4A1  | ELL2       | HIST3H2A   | FARP1         |
| SORBS2   | ELOVL1     | HK1        | FARP2         |
| SP5      | ENO1       | HMGA2      | FBLIM1        |
| SPP1     | ENTPD1     | HNMT       | FBXO42        |
| SPRR1A   | EPCAM      | HNRNPAB    | FBXW8         |
| SPRR2A   | EPHA7      | HRSP12     | FCRLA         |
| SRPX2    | ERH        | HSPBP1     | FGB           |
| SSR1     | ERRFI1     | ICA1       | FGF12         |
| ST3GAL4  | ES31       | ID2        | FGF5          |



|           |         |         |         |
|-----------|---------|---------|---------|
| STARD4    | ESRP1   | IDH3B   | FKBP1B  |
| STEAP2    | ETV2    | IGSF8   | FMOD    |
| SYNPR     | F10     | IL34    | FN1     |
| TGFB2     | F3      | IL4I1   | FNBP4   |
| TGM1      | F7      | IMMT    | FOXC2   |
| THBS2     | FAM117A | ING3    | FOXH1   |
| TIMP1     | FAM162A | ISY1    | FOXO1   |
| TINAGL1   | FAM3C   | IVD     | FOXO3   |
| TMEM213   | FAM49B  | JAGN1   | FOXP1   |
| TMEM40    | FASN    | JMJD8   | FUBP1   |
| TNC       | FBP2    | KBTBD2  | FURIN   |
| TNFRSF11B | FCER1G  | KCTD14  | FUT2    |
| TNFRSF22  | FCGR2B  | KCTD2   | GABRB2  |
| TNFSF9    | FKBP2   | KLF6    | GALNT10 |
| TPI1      | FKBP4   | KLHDC2  | GALNT4  |
| TPM1      | FMR1    | KLHL22  | GATAD2B |
| TPM2      | FNTA    | KPTN    | GDAP10  |
| TSPAN6    | FPR2    | LAMP2   | GDF11   |
| WISP1     | FUCA1   | LAPTM4B | GDI1    |
| WNT7A     | FV1     | LASS4   | GLB1    |
| YWHAZ     | G6PDX   | LDHB    | GLO1    |
| ZFP365    | GABPB1  | LONP2   | GLTPD1  |
| ZFP37     | GADD45A | LOX     | GM10345 |
| ZFP458    | GALNT3  | LOXL1   | GMCL1   |
| ZFP462    | GAPDH   | LPGAT1  | GNAI2   |
|           | GARS    | LZTR1   | GNRHR   |
|           | GAS5    | MACF1   | GON4L   |
|           | GCH1    | MAF1    | GPD1    |
|           | GGCX    | MAP3K7  | GPR133  |
|           | GJA1    | MCCC1   | GRINA   |
|           | GJA3    | MED1    | GRK4    |
|           | GJB2    | MEF2D   | GRWD1   |
|           | GJB3    | MFHAS1  | GSR     |
|           | GLRX    | MGA     | H2AFY   |
|           | GM10039 | MIA3    | HAUS2   |
|           | GM4736  | MKLN1   | HAX1    |
|           | GM4770  | MKRN2   | HDAC3   |
|           | GNB2L1  | MLC1    | HDAC7   |
|           | GNE     | MRI1    | HDGF    |
|           | GNL3    | MRPL44  | HEATR7A |
|           | GNS     | MRPL46  | HECTD3  |
|           | GOLM1   | MRPL49  | HIP1R   |
|           | GP49A   | MRPS12  | HNRNPK  |

|           |          |         |
|-----------|----------|---------|
| GPI1      | MRPS33   | HNRNPL  |
| GPR177    | MRRF     | HOXB7   |
| GPR56     | MS4A8A   | HOXD9   |
| GRHPR     | MSRB2    | HPCAL1  |
| GRINA     | MTHFD2   | HPD     |
| GSTT1     | MTMR7    | HSPA2   |
| H13       | MXI1     | HSPG2   |
| H19       | MYCN     | HTR3B   |
| H2-AA     | NA       | ID4     |
| H2-AB1    | NAGK     | IGF2    |
| H2-DMA    | NCAPH2   | IGF2BP2 |
| H2-DMB1   | NDUFA12  | IGSF6   |
| H2-EA     | NDUFA13  | IGSF8   |
| H2-EB1    | NDUFA3   | IKBKAP  |
| H2-M1     | NDUFA5   | IL27RA  |
| H2-M9     | NDUFA7   | INPP5B  |
| HAP1      | NDUFA9   | ISOC1   |
| HC        | NDUFB2   | ITGA5   |
| HDC       | NDUFS5   | JAG1    |
| HDLBP     | NDUFV1   | JARID2  |
| HEXA      | NDUFV3   | JUND    |
| HHEX      | NEAT1    | KALRN   |
| HIBADH    | NIPAL2   | KCNIP4  |
| HIF1A     | NIPSNAP1 | KCNJ10  |
| HIST1H2AB | NIT1     | KCNU1   |
| HIST1H3F  | NME3     | KIF17   |
| HK1       | NUDT1    | KIFC2   |
| HK2       | NUDT19   | KLB     |
| HMGB3     | OXSRI    | KLC3    |
| HMGNI     | PAICS    | KLF6    |
| HNF1B     | PAIP2    | KLHDC3  |
| HNRNPA1   | PAIP2B   | KRT20   |
| HOXD1     | PAPOLA   | LAD1    |
| HPN       | PARD6G   | LAMA5   |
| HRSP12    | PCBD1    | LARGE   |
| HSPA1B    | PCCA     | LARP5   |
| HSPA5     | PCK2     | LCN5    |
| HSPA8     | PCNP     | LENG8   |
| HSPA9     | PDE8A    | LEPR    |
| HSPH1     | PDIA6    | LIG3    |
| IBSP      | PDRG1    | LIN37   |
| ID2       | PECR     | LMNB1   |
| IFI30     | PF4      | LUC7L2  |

|         |          |          |
|---------|----------|----------|
| IGFBP3  | PFDN5    | MAFB     |
| IGH     | PGPEP1   | MAGI1    |
| IGH-3   | PHB      | MAP1LC3B |
| IGH-6   | PHGDH    | MAP2K7   |
| IGHG    | PHXR4    | MAP3K12  |
| IGK     | PI4K2A   | MAP3K7   |
| IGK-V1  | PI4K2B   | MAPK10   |
| IL11    | PIAS3    | MARE     |
| IL13RA2 | PIP5K1A  | MARK1    |
| IL18    | PITPNA   | MBOAT2   |
| IL4RA   | PKDCC    | MCPT-PS1 |
| INHBB   | PKHD1    | MDP1     |
| IQGAP1  | PKIB     | MED1     |
| ITGA4   | PLA2G1B  | MED26    |
| ITGA8   | PLAGL1   | MEF2D    |
| ITGAX   | PLEC1    | MIOS     |
| ITGB2   | PMEPA1   | MLPH     |
| ITIH4   | POLR1C   | MMP17    |
| ITM2C   | PRDX2    | MMP20    |
| ITPR2   | PRDX3    | MNT      |
| KCNJ15  | PRMT2    | MSL2     |
| KCNK1   | PRSS23   | MTA3     |
| KDELR1  | PRUNE    | MTF1     |
| KLF5    | PTK2B    | MTHFR    |
| KLHDC2  | PTP4A2   | MTSS1    |
| KNG1    | PTTG1    | MUC13    |
| KRAS    | PXN      | MYH1     |
| KRT18   | PYCRL    | MYH9     |
| KRT7    | QPCT     | MYO10    |
| KRT8    | RAB31    | MYO15    |
| KRT81   | RABL4    | MYO9B    |
| LAMB3   | RASD2    | MYPOP    |
| LAMC1   | RBM39    | MYST2    |
| LAMC2   | RBP4     | NA       |
| LAP3    | RCAN1    | NAPB     |
| LAPTM5  | RDH10    | NCKIPSD  |
| LAS1L   | RELL1    | NCOA1    |
| LBP     | RENBP    | NCOR2    |
| LCN2    | RFK      | NDRG2    |
| LCP1    | RGS5     | NDST1    |
| LDHA    | RNASEH2C | NFATC1   |
| LGALS3  | RNF181   | NFATC4   |
| LILRB4  | ROS1     | NFIA     |

|           |            |        |
|-----------|------------|--------|
| LITAF     | RPA3       | NFIB   |
| LOC630322 | RPL17      | NFKBIA |
| LPCAT1    | RPL36AL    | NGF    |
| LPCAT3    | RPN1       | NISCH  |
| LRG1      | RPS21      | NLGN2  |
| LRP2      | RPS9       | NOMO1  |
| LRRFIP1   | SCO2       | NOP16  |
| LSR       | SCRN2      | NOVA1  |
| LY6D      | SEC13      | NR1I2  |
| LY75      | SERBP1     | NTF3   |
| MAN1A     | SFRS7      | NUBP2  |
| MANF      | SFXN2      | NUP62  |
| MAP2K1    | SGCE       | OC90   |
| MAP3K11   | SGK1       | OCLN   |
| MAPK1     | SH3GLB1    | OGG1   |
| MAPRE1    | SHMT1      | OPRD1  |
| MARCO     | SLC12A2    | ORF19  |
| MATN4     | SLC15A1    | OSBPL6 |
| MBTD1     | SLC1A3     | OSCAR  |
| MCPT8     | SLC20A1    | OVGP1  |
| MDFI      | SLC23A1    | P2RX7  |
| MDFIC     | SLC2A3     | PABPN1 |
| ME1       | SLC35A5    | PACS2  |
| MEF2B     | SLC39A8    | PAM    |
| MEG3      | SLC40A1    | PARK2  |
| MLEC      | SLC7A2     | PARP4  |
| MMP12     | SLCO3A1    | PARS2  |
| MMP2      | SMARCE1    | PBX2   |
| MPEG1     | SNAP47     | PCGF6  |
| MRC1      | SNHG11     | PCYT1A |
| MRPL15    | SNRNP27    | PDE8A  |
| MRPS18B   | SOAT1      | PEX5   |
| MRPS34    | SOD1       | PFN1   |
| MSR1      | SOX13      | PGD    |
| MT1       | SPATA13    | PHEX   |
| MT2       | SPON1      | PHF1   |
| MTIF2     | SPR        | PHF13  |
| MTX1      | SPTLC2     | PHXR4  |
| MUC1      | SRPK1      | PI4K2B |
| MX1       | SSBP1      | PIAS3  |
| MYCN      | ST3GAL6    | PICK1  |
| MYH7      | ST6GALNAC3 | PIGO   |
| NAGK      | STAMBPL1   | PIK3CG |

|          |          |         |
|----------|----------|---------|
| NAPSA    | STBD1    | PION    |
| NCL      | STX19    | PIP     |
| NDUFAF4  | STX3     | PIP5K1A |
| NEK1     | STX8     | PIP5K1C |
| NEK4     | SUSD4    | PITPNC1 |
| NFIL3    | SYNGR1   | PITPNM1 |
| NMT1     | TAGLN2   | PIWIL1  |
| NNT      | TBC1D24  | PKD2L2  |
| NOP56    | TGFBI    | PLA2G1B |
| NPC2     | TGOLN1   | PLCD1   |
| NPDC1    | TMED6    | PLD4    |
| NR2F1    | TMEM19   | PLEC1   |
| NUCB2    | TMEM27   | PLS1    |
| NUDT4    | TMEM54   | PNMT    |
| NUP88    | TMEM87A  | POLR2A  |
| OBFC2A   | TMEM93   | POLR3A  |
| ORM1     | TMOD3    | POU5F1  |
| OSBPL1A  | TOMM7    | PPAT    |
| OSTF1    | TPP1     | PPCDC   |
| PABPC1   | TRAP1    | PPIG    |
| PAFAH1B3 | TRAPPC5  | PPP2R1A |
| PAPOLA   | TRAPPC6A | PPP2R4  |
| PCBD1    | TRF      | PRELP   |
| PCYOX1   | TRIM16   | PRKACB  |
| PCYT1A   | TRIM34   | PRLR    |
| PDIA6    | TRMT1    | PRODH   |
| PDK3     | TSHZ1    | PRPF6   |
| PFDN1    | TST      | PRSS22  |
| PFDN2    | TTC27    | PRSS29  |
| PFKL     | TTC39B   | PRX     |
| PFN1     | TWF2     | PSAPL1  |
| PGK1     | TXNL4A   | PSMB2   |
| PGLS     | UFD1L    | PSMD11  |
| PGLYRP1  | UQCR     | PSMD9   |
| PHB2     | UROS     | PSME3   |
| PHLDA1   | USE1     | PTF1A   |
| PHLDA2   | USP39    | PTPN21  |
| PIGA     | USP47    | PTPN5   |
| PIP4K2C  | UXS1     | PTPRF   |
| PIP5K1B  | VAMP3    | PUM1    |
| PISD     | VARS     | PVR     |
| PKHD1    | VPS37C   | PVT1    |
| PKM2     | WDTC1    | PXN     |

|           |               |          |
|-----------|---------------|----------|
| PLA2G5    | ZFAND5        | PYGL     |
| PLA2G7    | ZFP622        | PYY      |
| PLBD1     | ZFP68         | R3HDM1   |
| PLD3      | ZFP821        | R74862   |
| PLIN2     | ZFYVE21       | RAB15    |
| PLP2      | ZWINT         | RAB17    |
| PLXNB2    | 40429         | RAB22A   |
| POLG      | 1110002N22RIK | RAB27A   |
| POLR1C    | 1110005A03RIK | RAB8B    |
| POLR2E    | 1200016E24RIK | RAD51L1  |
| POLRMT    | 1700022C21RIK | RBBP4    |
| PON2      | 2310016E02RIK | RBM39    |
| PPARG     | 2410015M20RIK | RBM47    |
| PPP1R14B  | 3110049J23RIK | RBM9     |
| PPP2R5C   | 4930444A02RIK | RCAN3    |
| PRAMEL4   | 5330417C22RIK | RCOR1    |
| PRCC      | 5430437P03RIK | RD3      |
| PRDX4     | 9130404D08RIK | REEP3    |
| PRDX5     |               | REM1     |
| PRELID1   |               | RFXANK   |
| PRNP      |               | RHOX6    |
| PSAP      |               | RHOX9    |
| PSAT1     |               | RNF10    |
| PSCA      |               | RNF112   |
| PSEN1     |               | RPS6     |
| PSMB5     |               | RRAGA    |
| PSMD4     |               | RUSC1    |
| PSMD5     |               | SAMD11   |
| PSME1     |               | SCAMP2   |
| PTGR1     |               | SCLT1    |
| PTGS1     |               | SCNN1A   |
| PTPRF     |               | SDC3     |
| RABGGTB   |               | SDCCAG1  |
| RAP1GAP   |               | SDCCAG3  |
| RBP4      |               | SEC1     |
| RDH11     |               | SERAC1   |
| REEP6     |               | SERPINB8 |
| RELB      |               | SHARPIN  |
| RFK       |               | SHKBP1   |
| RNASSET2A |               | SHROOM1  |
| RNF149    |               | SHROOM3  |
| RNF181    |               | SIDT2    |
| RNF4      |               | SIGLEC5  |

|          |          |
|----------|----------|
| ROS1     | SIRT4    |
| RPL10A   | SLC12A9  |
| RPL14    | SLC22A17 |
| RPL28    | SLC24A6  |
| RPL3     | SLC25A29 |
| RPL36    | SLC25A37 |
| RPL37    | SLC26A1  |
| RPL6     | SLC26A3  |
| RPL8     | SLC26A8  |
| RPRM     | SLC28A3  |
| RPS18    | SLC2A2   |
| RPS2     | SLC39A9  |
| RPS8     | SLC3A1   |
| RRBP1    | SLC43A3  |
| S100A1   | SLC4A3   |
| S100G    | SLC4A4   |
| SAT1     | SLC6A18  |
| SCAMP1   | SLC6A6   |
| SCD1     | SLC8A2   |
| SCG3     | SLC9A3R2 |
| SDC1     | SNW1     |
| SEC23B   | SNX22    |
| SERPINE1 | SNX6     |
| SERPINE2 | SOX21    |
| SFRS6    | SPARC    |
| SFTPB    | SPATA19  |
| SH3RF1   | SPEN     |
| SHC1     | SPINT1   |
| SHMT1    | SPIRE2   |
| SIRPA    | SPSB1    |
| SIVA1    | SRR      |
| SLAIN1   | STAB1    |
| SLC12A2  | STAP2    |
| SLC15A2  | STAT5A   |
| SLC16A1  | STK10    |
| SLC25A39 | STMN3    |
| SLC25A5  | STS      |
| SLC2A4   | STX1A    |
| SLC31A1  | SUPT5H   |
| SLC34A2  | SUV420H1 |
| SLC38A2  | SYNGR3   |
| SLC4A4   | SYPL     |
| SLCO6C1  | SYT13    |

|          |          |
|----------|----------|
| SLPI     | TADA3L   |
| SND1     | TAF1C    |
| SNX10    | TAF7     |
| SOAT1    | TCF25    |
| SOCS2    | TCFAP4   |
| SOCS3    | TCRB-J   |
| SPG21    | TEKT2    |
| SPINT1   | TFIP11   |
| SPP1     | TFPT     |
| SSR4     | TIMP3    |
| ST13     | TMCO4    |
| ST3GAL4  | TMCO6    |
| ST6GAL1  | TMED2    |
| ST7      | TMEM120B |
| STARD10  | TMEM80   |
| STXBP2   | TMEM82   |
| TACSTD2  | TMEM87A  |
| TANK     | TMOD3    |
| TAOK3    | TNFRSF19 |
| TBC1D24  | TNIP1    |
| TCFCP2L1 | TNKS1BP1 |
| TCRB-J   | TNMD     |
| TES      | TNP2     |
| TGFBI    | TNRC6B   |
| TGIF1    | TOB2     |
| TGOLN1   | TOM1     |
| THBS1    | TOPORS   |
| TM2D2    | TPBG     |
| TMEM30A  | TPCN1    |
| TMEM30B  | TPM1     |
| TMEM49   | TPM3     |
| TMEM50B  | TPP1     |
| TMEM56   | TPRGL    |
| TMEM62   | TRAF3    |
| TNFAIP1  | TRIM34   |
| TNFSF9   | TRIOBP   |
| TNNT1    | TRIP11   |
| TOB1     | TRIP6    |
| TOM1L1   | TRPC2    |
| TPI1     | TSNAX    |
| TPM4     | TSPAN5   |
| TROVE2   | TTC13    |
| TSPAN8   | TTC28    |



|               |               |
|---------------|---------------|
| TSR1          | TUBB3         |
| TSTA3         | TUFT1         |
| TULP2         | TXNDC5        |
| TYROBP        | UBE3B         |
| UBQLN2        | UBL7          |
| UBXN1         | UBR4          |
| UOX           | UBXN10        |
| USP52         | UFD1L         |
| V165-D-J-C MU | UNC45A        |
| VAMP2         | UPF2          |
| VAMP8         | USF2          |
| VASP          | USH1C         |
| VEGFB         | USP48         |
| VIL1          | USP7          |
| WBP5          | UXS1          |
| XBP1          | VAMP5         |
| ZDHHC3        | VAPB          |
| ZDHHC6        | VPS11         |
| ZFP1          | VPS13C        |
| ZFP143        | VTN           |
| ZFP282        | WBSCR27       |
| ZFP42         | WDR1          |
| ZNHIT3        | WDTC1         |
| 0610010K14RIK | WNK4          |
| 1100001G20RIK | YLPM1         |
| 1110008P14RIK | YPEL1         |
| 1190002H23RIK | YWHAB         |
| 1600029D21RIK | YY1           |
| 1810046J19RIK | ZBTB7C        |
| 2410004N09RIK | ZC3H3         |
| 4933407C03RIK | ZC3H7A        |
| 5730469M10RIK | ZDHHC14       |
| 6330416G13RIK | ZFAND3        |
| 6820431F20RIK | ZFAND5        |
| 9130213B05RIK | ZFHX3         |
| A630007B06RIK | ZFP109        |
| AA516738      | ZFP295        |
|               | ZFP704        |
|               | ZP2           |
|               | 40430         |
|               | 1300010F03RIK |
|               | 1300018I17RIK |
|               | 1700019L03RIK |

1700028P14RIK  
1700088E04RIK  
2210415F13RIK  
2210419D22RIK  
2310044G17RIK  
2410075B13RIK  
2600001M11RIK  
4921517L17RIK  
4933407C03RIK  
4933417A18RIK  
9030425E11RIK  
9030624J02RIK  
9130404D08RIK  
A030005L19RIK  
A2LD1  
A830023I12RIK  
AA517545  
ZP2

40430

1300010F03RIK  
1300018I17RIK  
1700019L03RIK  
1700028P14RIK  
1700088E04RIK  
2210415F13RIK  
2210419D22RIK  
2310044G17RIK  
2410075B13RIK  
2600001M11RIK  
4921517L17RIK  
4933407C03RIK  
4933417A18RIK  
9030425E11RIK  
9030624J02RIK  
9130404D08RIK  
A030005L19RIK  
A2LD1  
A830023I12RIK  
AA517545
